# Supplementary material
Source: PubMed Central journal article supplement (PMC10208005)
Supplement: NIHMS1897543-supplement-Supplement.pdf [file NIHMS1897543-supplement-Supplement.pdf]

## Clinical outcomes associated with Omicron (B.1.1.529) variant and BA.1/BA.1.1 or BA.2 subvariant infection in southern California

Joseph A. Lewnard<sup>1,2,3,\*</sup>, Vennis X. Hong<sup>4</sup>, Manish M. Patel<sup>5</sup>, Rebecca Kahn<sup>5</sup>, Marc Lipsitch<sup>5</sup>, Sara Y. Tartof<sup>4,6,\*</sup>

1. Division of Epidemiology, School of Public Health, University of California, Berkeley, Berkeley, California 94720, United States
2. Division of Infectious Diseases & Vaccinology, School of Public Health, University of California, Berkeley, Berkeley, California 94720, United States
3. Center for Computational Biology, College of Engineering, University of California, Berkeley, Berkeley, California 94720, United States
4. Department of Research & Evaluation, Kaiser Permanente Southern California, Pasadena, California 91101, United States
5. COVID-19 Response Team, Centers for Disease Control and Prevention, Atlanta, Georgia, 30329, United States
6. Department of Health Systems Science, Kaiser Permanente Bernard J. Tyson School of Medicine, Pasadena, California 91101, United States

\* Addresses for correspondence:

Joseph A. Lewnard  
2121 Berkeley Way  
Berkeley, California 94720  
jLewnard@berkeley.edu  
510-664-4050

Sara Y. Tartof  
100 South Los Robles  
Pasadena, California 91101  
Sara.Y.Tartof@kp.org  
626-564-3001

### Contents of this supplement

|           |                                                                                                                                                                                         |    |
|-----------|-----------------------------------------------------------------------------------------------------------------------------------------------------------------------------------------|----|
| Table S1  | Concordance of SGTF infection status with Omicron or Delta variant detection.                                                                                                           | 3  |
| Table S2  | Demographic and clinical characteristics of cases tested in outpatient settings with and without SGTF, 15 December, 2021 to 17 January, 2022.                                           | 4  |
| Table S3  | Comorbid conditions among cases tested in outpatient settings with and without SGTF, 15 December, 2021 to 17 January.                                                                   | 6  |
| Table S4  | Combined history of documented SARS-CoV-2 infection and COVID-19 vaccination among cases diagnosed in outpatient settings with and without SGTF, 15 December, 2021 to 17 January, 2022. | 7  |
| Table S5  | Demographic and clinical characteristics of cases tested in outpatient settings with and without SGTF, 3 February to 17 March, 2022.                                                    | 8  |
| Table S6  | Combined history of documented SARS-CoV-2 infection and COVID-19 vaccination among cases diagnosed in outpatient settings with and without SGTF, 3 February to 17 March, 2022.          | 10 |
| Table S7  | Occurrence of severe clinical outcomes among cases with and without SGTF, 15 December, 2021 to 17 January, 2022.                                                                        | 11 |
| Table S8  | Occurrence of severe clinical outcomes among cases with and without SGTF, without symptoms at the time of their first positive test, 15 December, 2021 to 17 January, 2022.             | 12 |
| Table S9  | Comparison of associations of SGTF with clinical outcomes across differing missing-data analysis strategies, 15 December, 2021 to 17 January, 2022.                                     | 13 |
| Table S10 | Association of SGTF infection status with symptomatic hospitalization within various patient subgroups, 15 December, 2021 to 17 January, 2022.                                          | 14 |
| Table S11 | Comparison of associations of SGTF with clinical outcomes defined on the basis of the adjusted hazard ratio or adjusted risk ratio, 15 December, 2021 to 17 January, 2022.              | 15 |
| Table S12 | Occurrence of clinical outcomes among cases tested in outpatient settings with and without SGTF, 3 February to 17 March, 2022.                                                          | 16 |
| Table S13 | Association of various clinical and demographic characteristics with symptomatic hospital admission among cases with and without SGTF, 15 December, 2021 to 17 January, 2022.           | 17 |
| Table S14 | Occurrence of severe clinical outcomes among cases with and without SGTF, stratified by vaccination status, 15 December, 2021 to 17 January, 2022.                                      | 19 |

|           |                                                                                                                                                                                                                        |    |
|-----------|------------------------------------------------------------------------------------------------------------------------------------------------------------------------------------------------------------------------|----|
| Table S15 | Dates of change in slopes for Cox proportional hazards models relating testing date to risk of severe clinical outcomes.                                                                                               | 20 |
| Table S16 | Disposition at completion of hospitalization among patients with completed hospital stays.                                                                                                                             | 21 |
| Table S17 | Association of SGTF with time to completion of hospital stay among outpatient-diagnosed cases with symptoms onset on or before admission date, 15 December, 2021 to 17 January, 2022 and 3 February to 17 March, 2022. | 22 |
| Table S18 | Attributes of outpatient cases with samples processed using the ThermoFisher TaqPath COVID-19 Combo Kit or other assays, 1 November, 2021 to 17 March, 2022.                                                           | 23 |
| Table S19 | Onset of acute respiratory symptoms on or before dates of testing and hospital admission.                                                                                                                              | 25 |
| Table S20 | Attributes of outpatient cases with and without symptoms at the time of outpatient testing, 1 November, 2021 to 17 March, 2022.                                                                                        | 26 |
| Table S21 | Summary of missing data.                                                                                                                                                                                               | 27 |
| Table S22 | Association of imputed variables with symptomatic hospital admission endpoint across differing analysis strategies.                                                                                                    | 28 |
| Figure S1 | Estimates of the adjusted hazard ratio of any hospital admission under scenarios of differential unobserved prior infection prevalence across case strata.                                                             | 29 |
| Figure S2 | Estimates of the adjusted hazard ratio of symptomatic hospital admission under scenarios of differential unobserved prior infection prevalence across case strata.                                                     | 30 |
| Figure S3 | Adjusted hazard ratios of severe clinical endpoints associated with Omicron variant infection, without restriction by diagnosis setting.                                                                               | 31 |
| Figure S4 | Changes in the proportion of cases ascertained on or after the date of hospital admission                                                                                                                              | 32 |

**Table S1: Concordance of SGTF infection status with Omicron or Delta variant detection.**

| Period                       | S gene detection    | Variant detection        |                                      | Predictive accuracy of SGTF proxy definition for lineage (Omicron/Delta and BA.2/BA.1*) |
|------------------------------|---------------------|--------------------------|--------------------------------------|-----------------------------------------------------------------------------------------|
| December, 2021–January, 2022 |                     | <u>Delta (B.1.617.2)</u> | <u>Omicron (B.1.1.529)</u>           |                                                                                         |
|                              | Detected (non-SGTF) | 1092                     | 3                                    | 99.7%                                                                                   |
| February–March, 2022         | Not detected (SGTF) | 0                        | 382                                  | 100%                                                                                    |
|                              |                     | <u>BA.2</u>              | <u>BA.1* (BA.1/BA.1.1/B.1.1.529)</u> |                                                                                         |
|                              | Detected (non-SGTF) | 203                      | 7                                    | 96.7%                                                                                   |
|                              | Not detected (SGTF) | 0                        | 1,140                                | 100%                                                                                    |

SGTF: S gene target failure.

**Table S2: Demographic and clinical characteristics of cases tested in outpatient settings with and without SGTF, 15 December, 2021 to 17 January, 2022.**

| Characteristic                          | Number of cases (%)         |                             | Odds ratio (95% CI), Omicron vs. Delta |                       |
|-----------------------------------------|-----------------------------|-----------------------------|----------------------------------------|-----------------------|
|                                         | No SGTF (Delta)<br>N=23,305 | SGTF (Omicron)<br>N=222,688 | Unadjusted                             | Adjusted <sup>1</sup> |
| Age <sup>1</sup>                        |                             |                             |                                        |                       |
| <1 year                                 | 391 (1.7)                   | 1,174 (0.5)                 | 0.23 (0.21, 0.26)                      | 0.37 (0.33, 0.42)     |
| 1-4 year                                | 1,023 (4.4)                 | 6,579 (3.0)                 | 0.51 (0.47, 0.54)                      | 0.74 (0.68, 0.81)     |
| 5-9 years                               | 1,321 (5.7)                 | 12,235 (5.5)                | 0.74 (0.69, 0.79)                      | 0.95 (0.88, 1.03)     |
| 10-19 years                             | 3,218 (13.8)                | 28,510 (12.8)               | 0.72 (0.69, 0.76)                      | 0.76 (0.72, 0.80)     |
| 20-29 years                             | 3,096 (13.3)                | 37,894 (17.0)               | 1.10 (1.05, 1.16)                      | 1.11 (1.05, 1.16)     |
| 30-39 years                             | 3,942 (16.9)                | 45,165 (20.3)               | ref.                                   | ref.                  |
| 40-49 years                             | 3,770 (16.2)                | 37,685 (16.9)               | 0.84 (0.80, 0.88)                      | 0.80 (0.76, 0.84)     |
| 50-59 years                             | 3,310 (14.2)                | 29,205 (13.1)               | 0.72 (0.68, 0.75)                      | 0.67 (0.63, 0.70)     |
| 60-69 years                             | 1,973 (8.5)                 | 15,767 (7.1)                | 0.63 (0.60, 0.67)                      | 0.56 (0.53, 0.60)     |
| 70-79 years                             | 802 (3.4)                   | 5,946 (2.7)                 | 0.58 (0.53, 0.63)                      | 0.50 (0.45, 0.54)     |
| ≥80 years                               | 264 (1.1)                   | 1,564 (0.7)                 | 0.45 (0.39, 0.52)                      | 0.41 (0.35, 0.47)     |
| Sex                                     |                             |                             |                                        |                       |
| Female                                  | 12,926 (55.5)               | 123,227 (55.3)              | ref.                                   | ref.                  |
| Male                                    | 10,379 (44.5)               | 99,461 (44.7)               | 1.01 (0.98, 1.03)                      | 1.03 (1.00, 1.06)     |
| Race/ethnicity                          |                             |                             |                                        |                       |
| White, non-Hispanic                     | 5,788 (24.8)                | 49,411 (22.2)               | ref.                                   | ref.                  |
| Black, non-Hispanic                     | 1,552 (6.7)                 | 17,066 (7.7)                | 1.28 (1.21, 1.36)                      | 1.36 (1.28, 1.45)     |
| Hispanic                                | 11,792 (50.6)               | 111,574 (50.1)              | 1.03 (0.99, 1.06)                      | 1.00 (0.96, 1.03)     |
| Asian/Pacific Islander                  | 1,954 (8.4)                 | 23,406 (10.5)               | 1.33 (1.26, 1.40)                      | 1.12 (1.06, 1.18)     |
| Other, mixed race, or unknown race      | 2,219 (9.5)                 | 21,231 (9.5)                | 1.09 (1.03, 1.15)                      | 0.99 (0.93, 1.04)     |
| Community median income <sup>2</sup>    |                             |                             |                                        |                       |
| <\$50,000                               | 3,427 (15.0)                | 34,364 (15.7)               | 1.03 (0.99, 1.07)                      | 1.03 (0.99, 1.08)     |
| \$50,000-\$99,999                       | 14,271 (62.4)               | 133,710 (60.9)              | ref.                                   | ref.                  |
| \$100,000-\$149,999                     | 4,613 (20.2)                | 45,318 (20.6)               | 1.09 (1.05, 1.13)                      | 1.07 (1.03, 1.11)     |
| ≥\$150,000                              | 551 (2.4)                   | 6,131 (2.8)                 | 1.24 (1.13, 1.35)                      | 1.19 (1.09, 1.30)     |
| Cigarette smoking <sup>2</sup>          |                             |                             |                                        |                       |
| Never smoker                            | 14,172 (81.3)               | 134,059 (81.7)              | ref.                                   | ref.                  |
| Current smoker                          | 723 (4.1)                   | 6,865 (4.2)                 | 1.02 (0.94, 1.09)                      | 0.99 (0.91, 1.06)     |
| Former smoker                           | 2,535 (14.5)                | 23,150 (14.1)               | 0.99 (0.95, 1.03)                      | 1.01 (0.97, 1.05)     |
| Body mass index <sup>2</sup>            |                             |                             |                                        |                       |
| Underweight (<18.5)                     | 1,808 (10.2)                | 14,647 (8.8)                | 0.78 (0.74, 0.82)                      | 0.96 (0.90, 1.02)     |
| Normal weight (18.5-24.9)               | 4,138 (23.3)                | 41,117 (24.8)               | ref.                                   | ref.                  |
| Overweight (25.0-29.9)                  | 4,955 (27.9)                | 46,796 (28.2)               | 0.94 (0.90, 0.98)                      | 0.95 (0.91, 0.99)     |
| Obese (≥30)                             | 6,863 (38.6)                | 63,212 (38.1)               | 0.89 (0.85, 0.92)                      | 0.92 (0.88, 0.95)     |
| Prior year outpatient visits            |                             |                             |                                        |                       |
| 0-4                                     | 7,973 (34.2)                | 80,388 (36.1)               | ref.                                   | ref.                  |
| 5-9                                     | 6,190 (26.6)                | 61,656 (27.7)               | 1.00 (0.97, 1.04)                      | 0.97 (0.93, 1.00)     |
| 10-14                                   | 3,504 (15.0)                | 31,883 (14.3)               | 0.91 (0.88, 0.95)                      | 0.90 (0.86, 0.94)     |
| 15-19                                   | 1,948 (8.4)                 | 17,634 (7.9)                | 0.91 (0.86, 0.96)                      | 0.91 (0.86, 0.96)     |
| ≥20-29                                  | 3,690 (15.8)                | 31,127 (14.0)               | 0.84 (0.80, 0.87)                      | 0.87 (0.83, 0.92)     |
| Prior year ED visits                    |                             |                             |                                        |                       |
| 0                                       | 18,402 (79.0)               | 184,658 (82.9)              | ref.                                   | ref.                  |
| 1                                       | 3,340 (14.3)                | 27,489 (12.3)               | 0.82 (0.78, 0.85)                      | 0.88 (0.85, 0.92)     |
| 2                                       | 957 (4.1)                   | 6,632 (3.0)                 | 0.68 (0.63, 0.73)                      | 0.76 (0.71, 0.82)     |
| ≥3                                      | 606 (2.6)                   | 3,909 (1.8)                 | 0.62 (0.57, 0.68)                      | 0.73 (0.67, 0.81)     |
| Prior year inpatient admissions         |                             |                             |                                        |                       |
| 0                                       | 22,497 (96.5)               | 216,532 (97.2)              | ref.                                   | ref.                  |
| 1                                       | 431 (1.8)                   | 3,330 (1.5)                 | 0.78 (0.70, 0.86)                      | 0.88 (0.79, 0.98)     |
| 2                                       | 209 (0.9)                   | 1,388 (0.6)                 | 0.67 (0.58, 0.77)                      | 0.78 (0.67, 0.90)     |
| ≥3                                      | 168 (0.7)                   | 1,438 (0.6)                 | 0.84 (0.71, 0.99)                      | 1.00 (0.85, 1.19)     |
| Charlson comorbidity index              |                             |                             |                                        |                       |
| 0                                       | 18,502 (79.4)               | 181,317 (81.4)              | ref.                                   | ref.                  |
| 1-2                                     | 3,836 (16.5)                | 34,691 (15.6)               | 0.89 (0.86, 0.93)                      | 0.98 (0.94, 1.02)     |
| 3-5                                     | 710 (3.0)                   | 5,051 (2.3)                 | 0.67 (0.62, 0.73)                      | 0.87 (0.79, 0.95)     |
| ≥6                                      | 257 (1.1)                   | 1,629 (0.7)                 | 0.59 (0.52, 0.68)                      | 0.82 (0.70, 0.95)     |
| Prior SARS-CoV-2 infection <sup>3</sup> |                             |                             |                                        |                       |
| No documented previous infection        | 23,221 (99.6)               | 221,525 (99.5)              | ref.                                   | ref.                  |
| Documented previous infection           | 84 (0.4)                    | 1,163 (0.5)                 | 1.55 (1.23, 1.94)                      | 1.75 (1.39, 2.19)     |
| COVID-19 vaccination                    |                             |                             |                                        |                       |
| Unvaccinated                            | 9,802 (42.1)                | 65,480 (29.4)               | ref.                                   | ref.                  |
| Ad.26.COVS.S—1 dose                     | 717 (3.1)                   | 6,874 (3.1)                 | 1.50 (1.39, 1.63)                      | 1.56 (1.44, 1.70)     |
| Ad.26.COVS.S—with any booster dose      | 170 (0.7)                   | 2,329 (1.0)                 | 2.04 (1.74, 2.40)                      | 2.32 (1.97, 2.72)     |
| BNT162b2 or mRNA-1273—1 dose            | 646 (2.8)                   | 6,266 (2.8)                 | 1.43 (1.31, 1.56)                      | 1.38 (1.27, 1.51)     |

|                                                        |              |               |                   |                   |
|--------------------------------------------------------|--------------|---------------|-------------------|-------------------|
| BNT162b2 or mRNA-1273—2 doses ( $\geq 180$ days prior) | 7,492 (32.1) | 81,266 (36.5) | 1.68 (1.63, 1.74) | 1.75 (1.69, 1.82) |
| BNT162b2 or mRNA-1273—2 doses (91-180 days prior)      | 1,600 (6.9)  | 18,409 (8.3)  | 1.68 (1.58, 1.77) | 1.67 (1.58, 1.77) |
| BNT162b2 or mRNA-1273—2 doses ( $\leq 90$ days prior)  | 622 (2.7)    | 8,548 (3.8)   | 2.04 (1.87, 2.22) | 1.95 (1.79, 2.13) |
| BNT162b2 or mRNA-1273—3 doses                          | 2,256 (9.7)  | 33,516 (15.1) | 2.11 (2.01, 2.21) | 2.60 (2.47, 2.75) |

SGTF: S gene target failure, here interpreted as a proxy for SARS-CoV-2 variant; CI: Confidence interval.

<sup>1</sup>Logistic regression models control for all variables listed in the table, and define intercepts for testing date for both unadjusted and adjusted analyses.

<sup>2</sup>Multiple imputation was used to address missing data; numbers may not add to column totals where missing values occur. The number of missing observations for each variable is specified in **Table S21**.

<sup>3</sup>Previous infection defined by any positive test result or diagnosis  $\geq 90$  days prior to the date of the current test.

**Table S3: Comorbid conditions among cases tested in outpatient settings with and without SGTF, 15 December, 2021 to 17 January, 2022.**

| Condition                                                | Outpatient tested cases, <i>n</i> (%) |                   |                                        |                       | Symptomatic hospitalized cases, <i>n</i> (%) |                 |                                        |                       |
|----------------------------------------------------------|---------------------------------------|-------------------|----------------------------------------|-----------------------|----------------------------------------------|-----------------|----------------------------------------|-----------------------|
|                                                          | No SGTF (Delta)                       | SGTF (Omicron)    | Odds ratio (95% CI), Omicron vs. Delta |                       | No SGTF (Delta)                              | SGTF (Omicron)  | Odds ratio (95% CI), Omicron vs. Delta |                       |
|                                                          |                                       |                   | Unadjusted                             | Adjusted <sup>1</sup> |                                              |                 | Unadjusted                             | Adjusted <sup>1</sup> |
|                                                          | <i>N</i> =23,305                      | <i>N</i> =222,688 |                                        |                       | <i>N</i> =323                                | <i>N</i> =1,239 |                                        |                       |
| Myocardial infarction                                    | 167 (0.7)                             | 1,054 (0.5)       | 0.60 (0.51, 0.70)                      | 0.87 (0.73, 1.05)     | 18 (5.6)                                     | 33 (2.7)        | 0.44 (0.23, 0.84)                      | 0.69 (0.31, 1.53)     |
| Congestive heart failure                                 | 244 (1.0)                             | 1,499 (0.7)       | 0.59 (0.52, 0.68)                      | 0.94 (0.80, 1.10)     | 24 (7.4)                                     | 74 (6.0)        | 0.81 (0.48, 1.36)                      | 1.17 (0.60, 2.30)     |
| Peripheral vascular disease                              | 826 (3.5)                             | 5,742 (2.6)       | 0.67 (0.62, 0.72)                      | 0.97 (0.88, 1.07)     | 55 (17.0)                                    | 156 (12.6)      | 0.65 (0.45, 0.94)                      | 1.05 (0.61, 1.80)     |
| Cerebrovascular disease                                  | 178 (0.8)                             | 1,273 (0.6)       | 0.70 (0.59, 0.82)                      | 1.06 (0.89, 1.26)     | 14 (4.3)                                     | 31 (2.5)        | 0.63 (0.31, 1.29)                      | 1.02 (0.45, 2.35)     |
| Diabetes—controlled                                      | 1,303 (5.6)                           | 12,004 (5.4)      | 0.90 (0.85, 0.96)                      | 0.99 (0.92, 1.05)     | 32 (9.9)                                     | 146 (11.8)      | 1.20 (0.77, 1.86)                      | 1.16 (0.74, 1.83)     |
| Diabetes—uncontrolled                                    | 739 (3.2)                             | 5,432 (2.4)       | 0.71 (0.65, 0.76)                      | 0.92 (0.83, 1.01)     | 41 (12.7)                                    | 139 (11.2)      | 0.85 (0.56, 1.27)                      | 0.88 (0.52, 1.47)     |
| Liver disease—mild                                       | 566 (2.4)                             | 4,848 (2.2)       | 0.86 (0.79, 0.94)                      | 0.98 (0.90, 1.08)     | 11 (3.4)                                     | 67 (5.4)        | 1.71 (0.85, 3.44)                      | 1.66 (0.84, 3.26)     |
| Liver disease—moderate to severe                         | 32 (0.1)                              | 148 (0.1)         | 0.46 (0.31, 0.68)                      | 0.72 (0.48, 1.07)     | 1 (0.3)                                      | 9 (0.7)         | 1.55 (0.19, 12.8)                      | 1.85 (0.20, 17.1)     |
| Renal disease                                            | 515 (2.2)                             | 3,539 (1.6)       | 0.67 (0.61, 0.73)                      | 0.93 (0.83, 1.05)     | 33 (10.2)                                    | 128 (10.3)      | 1.06 (0.68, 1.65)                      | 1.41 (0.77, 2.60)     |
| Chronic obstructive pulmonary disease                    | 1,864 (8.0)                           | 16,071 (7.2)      | 0.88 (0.84, 0.93)                      | 0.98 (0.87, 1.10)     | 58 (18.0)                                    | 162 (13.1)      | 0.62 (0.43, 0.88)                      | 0.43 (0.22, 0.86)     |
| Asthma                                                   | 1,741 (7.5)                           | 15,219 (6.8)      | 0.90 (0.85, 0.95)                      | 0.99 (0.88, 1.11)     | 41 (12.7)                                    | 135 (10.9)      | 0.78 (0.52, 1.16)                      | 1.58 (0.75, 3.31)     |
| Apnea                                                    | 801 (3.4)                             | 6,743 (3.0)       | 0.86 (0.80, 0.92)                      | 0.99 (0.92, 1.08)     | 25 (7.7)                                     | 96 (7.7)        | 0.96 (0.59, 1.58)                      | 1.26 (0.73, 2.16)     |
| Hyperlipidemia                                           | 3,522 (15.1)                          | 30,348 (13.6)     | 0.85 (0.82, 0.89)                      | 1.02 (0.97, 1.07)     | 109 (33.7)                                   | 342 (27.6)      | 0.68 (0.51, 0.91)                      | 0.85 (0.59, 1.22)     |
| Hypothyroid                                              | 741 (3.2)                             | 5,904 (2.7)       | 0.81 (0.75, 0.88)                      | 0.95 (0.88, 1.04)     | 19 (5.9)                                     | 84 (6.8)        | 1.09 (0.62, 1.89)                      | 1.07 (0.61, 1.88)     |
| Depression                                               | 1,868 (8.0)                           | 17,715 (8.0)      | 1.01 (0.96, 1.06)                      | 1.03 (0.97, 1.09)     | 37 (11.5)                                    | 155 (12.5)      | 1.25 (0.82, 1.89)                      | 1.21 (0.77, 1.89)     |
| Dementia                                                 | 52 (0.2)                              | 313 (0.1)         | 0.55 (0.41, 0.74)                      | 0.93 (0.68, 1.27)     | 4 (1.2)                                      | 14 (1.1)        | 0.80 (0.24, 2.67)                      | 1.03 (0.26, 4.10)     |
| Rheumatic disease                                        | 203 (0.9)                             | 1,568 (0.7)       | 0.78 (0.68, 0.91)                      | 0.90 (0.77, 1.05)     | 3 (0.9)                                      | 33 (2.7)        | 4.01 (1.04, 15.5)                      | 2.67 (0.84, 8.53)     |
| Peptic ulcer disease                                     | 43 (0.2)                              | 216 (0.1)         | 0.51 (0.36, 0.71)                      | 0.69 (0.49, 0.97)     | 3 (0.9)                                      | 11 (0.9)        | 1.17 (0.29, 4.74)                      | 0.91 (0.18, 4.70)     |
| Paraplegia and hemiplegia                                | 37 (0.2)                              | 272 (0.1)         | 0.72 (0.51, 1.03)                      | 0.98 (0.68, 1.41)     | 3 (0.9)                                      | 8 (0.6)         | 0.70 (0.16, 3.14)                      | 0.43 (0.10, 1.85)     |
| Organ transplantation                                    | 44 (0.2)                              | 252 (0.1)         | 0.55 (0.40, 0.77)                      | 0.61 (0.43, 0.87)     | 2 (0.6)                                      | 28 (2.3)        | 2.71 (0.63, 11.7)                      | 0.72 (0.18, 2.85)     |
| HIV                                                      | 13 (0.1)                              | 133 (0.1)         | 0.99 (0.56, 1.75)                      | 0.96 (0.54, 1.72)     | 0 (0.0)                                      | 1 (0.1)         | —                                      | —                     |
| Cancer—Metastatic carcinoma                              | 74 (0.3)                              | 592 (0.3)         | 0.81 (0.63, 1.04)                      | 1.05 (0.81, 1.35)     | 4 (1.2)                                      | 14 (1.1)        | 0.82 (0.25, 2.70)                      | 1.18 (0.35, 3.93)     |
| Cancer—other                                             | 289 (1.2)                             | 2,234 (1.0)       | 0.77 (0.68, 0.88)                      | 0.96 (0.84, 1.09)     | 13 (4.0)                                     | 59 (4.8)        | 1.09 (0.57, 2.07)                      | 1.17 (0.61, 2.23)     |
| Other immunocompromising or immune suppressing condition | 541 (2.3)                             | 4,778 (2.1)       | 0.91 (0.84, 1.00)                      | 1.04 (0.95, 1.15)     | 17 (5.3)                                     | 91 (7.3)        | 1.55 (0.87, 2.75)                      | 1.45 (0.77, 2.72)     |

SGTF: S gene target failure, here interpreted as a proxy for SARS-CoV-2 variant; CI: Confidence interval.

<sup>1</sup>Logistic regression models control for all variables listed in **Table S2**, and define intercepts for testing date for both unadjusted and adjusted analyses.

**Table S4: Combined history of documented SARS-CoV-2 infection and COVID-19 vaccination among cases diagnosed in outpatient settings with and without SGTF, 15 December, 2021 to 17 January, 2022.**

| Vaccination history                               | History of prior infection                 | Number of cases (%)         |                             | Odds ratio (95% CI), Omicron vs. Delta |                       |
|---------------------------------------------------|--------------------------------------------|-----------------------------|-----------------------------|----------------------------------------|-----------------------|
|                                                   |                                            | No SGTF (Delta)<br>N=23,305 | SGTF (Omicron)<br>N=222,688 | Unadjusted                             | Adjusted <sup>1</sup> |
| Unvaccinated                                      | No documented previous infection           | 9,760 (41.9)                | 64,920 (29.2)               | ref.                                   | ref.                  |
|                                                   | Documented previous infection              | 42 (0.2)                    | 560 (0.3)                   | 2.13 (1.54, 2.94)                      | 2.14 (1.55, 2.95)     |
| Ad.26.COVS.S—1 dose                               | No documented previous infection           | 716 (3.1)                   | 6,825 (3.1)                 | 1.50 (1.38, 1.63)                      | 1.56 (1.43, 1.69)     |
|                                                   | Documented previous infection <sup>3</sup> | 1 (<0.1)                    | 49 (<0.1)                   | 9.10 (1.25, 66.5)                      | 8.58 (1.19, 61.9)     |
| Ad.26.COVS.S—with any booster dose                | No documented previous infection           | 169 (0.7)                   | 2,324 (1.0)                 | 2.06 (1.76, 2.42)                      | 2.33 (1.98, 2.74)     |
|                                                   | Documented previous infection              | 1 (<0.1)                    | 5 (<0.1)                    | 0.65 (0.08, 5.57)                      | 0.77 (0.09, 6.62)     |
| BNT162b2 or mRNA-1973—1 dose                      | No documented previous infection           | 644 (2.8)                   | 6,230 (2.8)                 | 1.43 (1.32, 1.56)                      | 1.38 (1.27, 1.51)     |
|                                                   | Documented previous infection              | 2 (<0.1)                    | 36 (<0.1)                   | 3.10 (0.73, 13.1)                      | 3.11 (0.74, 13.2)     |
| BNT162b2 or mRNA-1973—2 doses (>180 days prior)   | No documented previous infection           | 7,477 (32.1)                | 81,039 (36.4)               | 1.69 (1.64, 1.75)                      | 1.76 (1.69, 1.82)     |
|                                                   | Documented previous infection              |                             |                             | 2.28 (1.34, 3.87)                      | 2.43 (1.43, 4.12)     |
| BNT162b2 or mRNA-1973—2 doses (91-180 days prior) | No documented previous infection           | 1,589 (6.8)                 | 18,255 (8.2)                | 1.68 (1.59, 1.78)                      | 1.68 (1.58, 1.78)     |
|                                                   | Documented previous infection              | 11 (<0.1)                   | 154 (0.1)                   | 2.03 (1.10, 3.78)                      | 2.10 (1.13, 3.91)     |
| BNT162b2 or mRNA-1973—2 doses (≤90 days prior)    | No documented previous infection           | 619 (2.7)                   | 8,466 (3.8)                 | 2.03 (1.87, 2.22)                      | 1.94 (1.78, 2.12)     |
|                                                   | Documented previous infection              | 3 (<0.1)                    | 82 (<0.1)                   | 6.06 (1.84, 19.9)                      | 6.26 (1.86, 21.0)     |
| BNT162b2 or mRNA-1973—3 doses                     | No documented previous infection           | 2,247 (9.6)                 | 33,466 (15.0)               | 2.12 (2.02, 2.23)                      | 2.62 (2.48, 2.76)     |
|                                                   | Documented previous infection              | 9 (<0.1)                    | 50 (<0.1)                   | 0.91 (0.43, 1.93)                      | 1.16 (0.55, 2.45)     |

SGTF: S gene target failure, here interpreted as a proxy for SARS-CoV-2 variant; CI: confidence interval.

<sup>1</sup>Logistic regression models control for all variables listed in **Table S2**, and define intercepts for testing date for both unadjusted and adjusted analyses.

**Table S5: Demographic and clinical characteristics of cases tested in outpatient settings with and without SGTF, 3 February to 17 March, 2022.**

| Characteristic                                    | Number of cases (%)       |                          | Odds ratio (95% CI), BA.2 vs. BA.1* |                       |
|---------------------------------------------------|---------------------------|--------------------------|-------------------------------------|-----------------------|
|                                                   | No SGTF (BA.2)<br>N=1,905 | SGTF (BA.1*)<br>N=12,756 | Unadjusted                          | Adjusted <sup>1</sup> |
| Age <sup>1</sup>                                  |                           |                          |                                     |                       |
| <1 year                                           | 53 (2.8)                  | 157 (1.2)                | 2.95 (2.09, 4.17)                   | 2.75 (1.90, 3.99)     |
| 1-4 year                                          | 104 (5.5)                 | 608 (4.8)                | 1.46 (1.14, 1.88)                   | 1.47 (1.04, 2.08)     |
| 5-9 years                                         | 89 (4.7)                  | 904 (7.1)                | 0.82 (0.63, 1.06)                   | 1.03 (0.74, 1.43)     |
| 10-19 years                                       | 217 (11.4)                | 1,432 (11.2)             | 1.29 (1.06, 1.56)                   | 1.44 (1.17, 1.78)     |
| 20-29 years                                       | 197 (10.3)                | 1,393 (10.9)             | 1.11 (0.91, 1.36)                   | 1.12 (0.91, 1.37)     |
| 30-39 years                                       | 315 (16.5)                | 2,421 (19.0)             | ref.                                | ref.                  |
| 40-49 years                                       | 271 (14.2)                | 2,090 (16.4)             | 1.03 (0.86, 1.23)                   | 1.02 (0.85, 1.22)     |
| 50-59 years                                       | 272 (14.3)                | 1,624 (12.7)             | 1.36 (1.14, 1.64)                   | 1.36 (1.13, 1.63)     |
| 60-69 years                                       | 230 (12.1)                | 1,240 (9.7)              | 1.54 (1.27, 1.87)                   | 1.51 (1.23, 1.85)     |
| 70-79 years                                       | 102 (5.4)                 | 632 (5.0)                | 1.25 (0.97, 1.61)                   | 1.21 (0.91, 1.59)     |
| ≥80 years                                         | 39 (2.0)                  | 218 (1.7)                | 1.45 (0.99, 2.12)                   | 1.32 (0.87, 2.00)     |
| Sex                                               |                           |                          |                                     |                       |
| Female                                            | 1,040 (54.6)              | 6,844 (53.7)             | ref.                                | ref.                  |
| Male                                              | 865 (45.4)                | 5,912 (46.3)             | 0.99 (0.89, 1.09)                   | 0.98 (0.88, 1.08)     |
| Race/ethnicity                                    |                           |                          |                                     |                       |
| White, non-Hispanic                               | 504 (26.5)                | 3,354 (26.3)             | ref.                                | ref.                  |
| Black, non-Hispanic                               | 109 (5.7)                 | 737 (5.8)                | 1.00 (0.79, 1.26)                   | 1.01 (0.80, 1.28)     |
| Hispanic                                          | 858 (45.0)                | 6,041 (47.4)             | 0.97 (0.86, 1.10)                   | 1.01 (0.89, 1.16)     |
| Asian/Pacific Islander                            | 256 (13.4)                | 1,489 (11.7)             | 1.06 (0.89, 1.26)                   | 1.15 (0.96, 1.37)     |
| Other, mixed race, or unknown race                | 178 (9.3)                 | 1,135 (8.9)              | 1.06 (0.88, 1.29)                   | 1.15 (0.95, 1.41)     |
| Community median income <sup>2</sup>              |                           |                          |                                     |                       |
| <\$50,000                                         | 306 (16.5)                | 1,950 (15.6)             | 1.11 (0.96, 1.27)                   | 1.11 (0.97, 1.29)     |
| \$50,000-\$99,999                                 | 1,059 (57.1)              | 7,459 (59.7)             | ref.                                | ref.                  |
| \$100,000-\$149,999                               | 445 (24.0)                | 2,694 (21.6)             | 1.08 (0.95, 1.22)                   | 1.07 (0.94, 1.22)     |
| ≥\$150,000                                        | 46 (2.5)                  | 390 (3.1)                | 0.84 (0.59, 1.19)                   | 0.79 (0.56, 1.13)     |
| Cigarette smoking <sup>2</sup>                    |                           |                          |                                     |                       |
| Never smoker                                      | 1,120 (79.0)              | 7,796 (80.8)             | ref.                                | ref.                  |
| Current smoker                                    | 63 (4.4)                  | 340 (3.5)                | 1.19 (0.93, 1.51)                   | 1.23 (0.95, 1.57)     |
| Former smoker                                     | 234 (16.5)                | 1,512 (15.7)             | 1.10 (0.95, 1.27)                   | 1.11 (0.95, 1.30)     |
| Body mass index <sup>2</sup>                      |                           |                          |                                     |                       |
| Underweight (<18.5)                               | 156 (10.4)                | 1,226 (12.0)             | 0.92 (0.75, 1.12)                   | 0.93 (0.71, 1.22)     |
| Normal weight (18.5-24.9)                         | 374 (24.9)                | 2,436 (23.8)             | ref.                                | ref.                  |
| Overweight (25.0-29.9)                            | 441 (29.4)                | 2,895 (28.3)             | 1.03 (0.88, 1.20)                   | 1.01 (0.85, 1.18)     |
| Obese (≥30)                                       | 530 (35.3)                | 3,669 (35.9)             | 1.00 (0.87, 1.15)                   | 0.98 (0.84, 1.14)     |
| Prior year outpatient visits                      |                           |                          |                                     |                       |
| 0-4                                               | 480 (25.2)                | 3,518 (27.6)             | ref.                                | ref.                  |
| 5-9                                               | 465 (24.4)                | 3,343 (26.2)             | 1.00 (0.87, 1.16)                   | 0.98 (0.85, 1.14)     |
| 10-14                                             | 333 (17.5)                | 1,990 (15.6)             | 1.23 (1.05, 1.43)                   | 1.15 (0.97, 1.36)     |
| 15-19                                             | 183 (9.6)                 | 1,270 (10.0)             | 1.07 (0.88, 1.29)                   | 0.97 (0.79, 1.19)     |
| ≥20                                               | 444 (23.3)                | 2,635 (20.7)             | 1.22 (1.05, 1.41)                   | 1.09 (0.92, 1.31)     |
| Prior year ED visits                              |                           |                          |                                     |                       |
| 0                                                 | 1,434 (75.3)              | 10,264 (80.5)            | ref.                                | ref.                  |
| 1                                                 | 302 (15.9)                | 1,704 (13.4)             | 1.29 (1.12, 1.48)                   | 1.25 (1.08, 1.45)     |
| 2                                                 | 98 (5.1)                  | 467 (3.7)                | 1.56 (1.23, 1.97)                   | 1.51 (1.18, 1.92)     |
| ≥3                                                | 71 (3.7)                  | 321 (2.5)                | 1.66 (1.26, 2.19)                   | 1.64 (1.22, 2.20)     |
| Prior year inpatient admissions                   |                           |                          |                                     |                       |
| 0                                                 | 1,829 (96.0)              | 12,265 (96.2)            | ref.                                | ref.                  |
| 1                                                 | 34 (1.8)                  | 254 (2.0)                | 0.89 (0.61, 1.29)                   | 0.74 (0.51, 1.09)     |
| 2                                                 | 19 (1.0)                  | 115 (0.9)                | 1.13 (0.68, 1.86)                   | 0.99 (0.59, 1.65)     |
| ≥3                                                | 23 (1.2)                  | 122 (1.0)                | 1.20 (0.75, 1.92)                   | 1.00 (0.62, 1.63)     |
| Charlson comorbidity index                        |                           |                          |                                     |                       |
| 0                                                 | 1,455 (76.4)              | 9,884 (77.5)             | ref.                                | ref.                  |
| 1-2                                               | 336 (17.6)                | 2,231 (17.5)             | 1.05 (0.92, 1.20)                   | 0.93 (0.81, 1.08)     |
| 3-5                                               | 74 (3.9)                  | 466 (3.7)                | 1.06 (0.81, 1.38)                   | 0.80 (0.59, 1.09)     |
| ≥6                                                | 40 (2.1)                  | 175 (1.4)                | 1.53 (1.06, 2.21)                   | 1.11 (0.73, 1.68)     |
| Prior SARS-CoV-2 infection <sup>3</sup>           |                           |                          |                                     |                       |
| No documented previous infection                  | 1,898 (99.6)              | 12,681 (99.4)            | ref.                                | ref.                  |
| Documented previous infection                     | 7 (0.4)                   | 75 (0.6)                 | 0.68 (0.30, 1.52)                   | 0.70 (0.31, 1.60)     |
| COVID-19 vaccination                              |                           |                          |                                     |                       |
| Unvaccinated                                      | 594 (31.2)                | 3,858 (30.2)             | ref.                                | ref.                  |
| Ad.26.COV2.S—1 dose                               | 34 (1.8)                  | 273 (2.1)                | 0.78 (0.53, 1.14)                   | 0.84 (0.57, 1.25)     |
| Ad.26.COV2.S—with any booster dose                | 38 (2.0)                  | 203 (1.6)                | 1.11 (0.77, 1.62)                   | 1.14 (0.78, 1.67)     |
| BNT162b2 or mRNA-1273—1 dose                      | 33 (1.7)                  | 287 (2.2)                | 0.73 (0.49, 1.07)                   | 0.79 (0.54, 1.17)     |
| BNT162b2 or mRNA-1273—2 doses (≥180 days prior)   | 424 (22.3)                | 2,826 (22.2)             | 0.93 (0.81, 1.07)                   | 0.99 (0.85, 1.16)     |
| BNT162b2 or mRNA-1273—2 doses (91-180 days prior) | 94 (4.9)                  | 863 (6.8)                | 0.72 (0.57, 0.91)                   | 0.77 (0.60, 0.99)     |
| BNT162b2 or mRNA-1273—2 doses (≤90 days prior)    | 47 (2.5)                  | 625 (4.9)                | 0.48 (0.35, 0.65)                   | 0.53 (0.38, 0.74)     |
| BNT162b2 or mRNA-1273—3 doses                     | 641 (33.6)                | 3,821 (30.0)             | 0.95 (0.83, 1.07)                   | 0.97 (0.83, 1.13)     |



SGTF: S gene target failure, here interpreted as a proxy for SARS-CoV-2 variant.

<sup>1</sup>Logistic regression models control for all variables listed in the table, and define intercepts for testing date for both unadjusted and adjusted analyses.

<sup>2</sup>Multiple imputation was used to address missing data; numbers may not add to column totals where missing values occur. The number of missing observations for each variable is specified in **Table S21**.

<sup>3</sup>Previous infection defined by any positive test result or diagnosis  $\geq 90$  days prior to the date of the current test.

**Table S6: Combined history of documented SARS-CoV-2 infection and COVID-19 vaccination among cases diagnosed in outpatient settings with and without SGTF, 3 February to 17 March, 2022.**

| Vaccination history                               | History of prior infection                 | Number of cases (%)       |                          | Odds ratio (95% CI), BA.2 vs. BA.1* |                       |
|---------------------------------------------------|--------------------------------------------|---------------------------|--------------------------|-------------------------------------|-----------------------|
|                                                   |                                            | No SGTF (BA.2)<br>N=1,905 | SGTF (BA.1*)<br>N=12,756 | Unadjusted                          | Adjusted <sup>1</sup> |
| Unvaccinated                                      | No documented previous infection           | 589 (30.9)                | 3,821 (30.0)             | ref.                                | ref.                  |
|                                                   | Documented previous infection              | 5 (0.3)                   | 37 (0.3)                 | 0.91 (0.33, 2.45)                   | 1.05 (0.38, 2.90)     |
| Ad.26.COV2.S—1 dose                               | No documented previous infection           | 34 (1.8)                  | 272 (2.1)                | 0.78 (0.53, 1.15)                   | 0.85 (0.57, 1.25)     |
|                                                   | Documented previous infection <sup>3</sup> | 0 (0.0)                   | 1 (<0.1)                 | --                                  | --                    |
| Ad.26.COV2.S—with any booster dose                | No documented previous infection           | 38 (2.0)                  | 202 (1.6)                | 1.12 (0.77, 1.62)                   | 1.15 (0.78, 1.69)     |
|                                                   | Documented previous infection              | 0 (0.0)                   | 1 (<0.1)                 | --                                  | --                    |
| BNT162b2 or mRNA-1973—1 dose                      | No documented previous infection           | 33 (1.7)                  | 285 (2.2)                | 0.73 (0.49, 1.08)                   | 0.80 (0.54, 1.18)     |
|                                                   | Documented previous infection              | 0 (0.0)                   | 2 (<0.1)                 | --                                  | --                    |
| BNT162b2 or mRNA-1973—2 doses (>180 days prior)   | No documented previous infection           | 423 (22.2)                | 2,810 (22.0)             | 0.93 (0.81, 1.07)                   | 1.00 (0.85, 1.17)     |
|                                                   | Documented previous infection              | 1 (0.1)                   | 16 (0.1)                 | 0.45 (0.06, 3.48)                   | 0.43 (0.06, 3.33)     |
| BNT162b2 or mRNA-1973—2 doses (91-180 days prior) | No documented previous infection           | 93 (4.9)                  | 853 (6.7)                | 0.72 (0.57, 0.91)                   | 0.77 (0.60, 0.99)     |
|                                                   | Documented previous infection              | 1 (0.1)                   | 10 (0.1)                 | 0.66 (0.08, 5.20)                   | 0.68 (0.08, 5.50)     |
| BNT162b2 or mRNA-1973—2 doses (≤90 days prior)    | No documented previous infection           | 47 (2.5)                  | 624 (4.9)                | 0.48 (0.35, 0.66)                   | 0.53 (0.38, 0.74)     |
|                                                   | Documented previous infection              | 0 (0.0)                   | 1 (<0.1)                 | --                                  | --                    |
| BNT162b2 or mRNA-1973—3 doses                     | No documented previous infection           | 641 (33.6)                | 3,814 (29.9)             | 0.95 (0.83, 1.07)                   | 0.97 (0.83, 1.14)     |
|                                                   | Documented previous infection              | 0 (0.0)                   | 7 (0.1)                  | --                                  | --                    |

SGTF: S gene target failure, here interpreted as a proxy for SARS-CoV-2 variant; CI: confidence interval.

<sup>1</sup>Logistic regression models control for all variables listed in **Table S2**, and define intercepts for testing date for both unadjusted and adjusted analyses.

**Table S7: Occurrence of severe clinical outcomes among cases with and without SGTF, 15 December, 2021 to 17 January, 2022.**

| Outcome                                     | Case population <sup>1</sup>        | Cumulative events over observed follow-up (n of events per 1000 cases) |                | Event rate per 10,000 person-days observed (n of events/person-days at risk) |                        | Hazard ratio (95% CI), Omicron vs. Delta |                   |
|---------------------------------------------|-------------------------------------|------------------------------------------------------------------------|----------------|------------------------------------------------------------------------------|------------------------|------------------------------------------|-------------------|
|                                             |                                     | No SGTF (Delta)                                                        | SGTF (Omicron) | No SGTF (Delta)                                                              | SGTF (Omicron)         | Unadjusted                               | Adjusted          |
| Any hospital admission                      | Cases tested in outpatient settings | 241 (10.3)                                                             | 991 (4.5)      | 3.61 (241/667,630)                                                           | 1.55 (991/6,413,416)   | 0.48 (0.42, 0.56)                        | 0.59 (0.51, 0.69) |
|                                             | All cases                           | 369 (15.7)                                                             | 1,642 (7.3)    | 5.53 (369/667,696)                                                           | 2.56 (1,642/6,413,759) | 0.50 (0.44, 0.56)                        | 0.61 (0.54, 0.68) |
| Symptomatic hospital admission <sup>1</sup> | Cases tested in outpatient settings | 226 (9.7)                                                              | 878 (3.9)      | 3.39 (226/667,630)                                                           | 1.37 (878/6,413,416)   | 0.46 (0.40, 0.54)                        | 0.59 (0.51, 0.68) |
|                                             | All cases                           | 323 (13.7)                                                             | 1,239 (5.5)    | 4.84 (323/667,696)                                                           | 1.93 (1,239/6,413,759) | 0.44 (0.38, 0.50)                        | 0.55 (0.49, 0.62) |
| ICU admission                               | Cases tested in outpatient settings | 26 (1.1)                                                               | 51 (0.2)       | 0.19 (26/1,363,726)                                                          | 0.04 (51/13,062,884)   | 0.27 (0.15, 0.40)                        | 0.50 (0.29, 0.87) |
|                                             | All cases                           | 29 (1.2)                                                               | 57 (0.3)       | 0.21 (29/1,371,050)                                                          | 0.04 (57/13,100,749)   | 0.24 (0.15, 0.39)                        | 0.48 (0.29, 0.81) |
| Mechanical ventilation                      | Cases tested in outpatient settings | 17 (0.7)                                                               | 24 (0.1)       | 0.12 (17/1,364,195)                                                          | 0.02 (24/13,064,223)   | 0.18 (0.09, 0.35)                        | 0.36 (0.18, 0.72) |
|                                             | All cases                           | 19 (0.8)                                                               | 26 (0.1)       | 0.14 (19/1,371,577)                                                          | 0.02 (26/13,102,322)   | 0.17 (0.09, 0.33)                        | 0.32 (0.17, 0.62) |
| Death                                       | Cases tested in outpatient settings | 19 (0.8)                                                               | 19 (0.1)       | 0.14 (19/1,364,392)                                                          | 0.01 (19/13,064,699)   | 0.12 (0.06, 0.23)                        | 0.21 (0.10, 0.44) |
|                                             | All cases                           | 19 (0.8)                                                               | 19 (0.1)       | 0.14 (19/1,371,886)                                                          | 0.01 (19/13,102,914)   | 0.12 (0.06, 0.23)                        | 0.21 (0.10, 0.44) |

SGTF: S gene target failure, here interpreted as a proxy for SARS-CoV-2 variant; CI: confidence interval. Sample includes 23,305 and 222,688 cases with Delta and Omicron variant infection, respectively, diagnosed in outpatient settings.

<sup>1</sup>We define symptomatic hospital admissions as those occurring among cases with respiratory symptom onset dates on or ≤14 days before the date of admission.

**Table S8: Occurrence of clinical outcomes among cases with and without SGTF, without symptoms at the time of their first positive test, 15 December, 2021 to 17 January, 2022.**

| Outcome                                     | Case population <sup>1</sup>                         | Cumulative events over observed follow-up ( <i>n</i> of events per 1,000 cases) |                | Event rate per 10,000 person-days observed ( <i>n</i> of events/person-days at risk) |                        | Hazard ratio (95% CI), Omicron vs. Delta |                   |
|---------------------------------------------|------------------------------------------------------|---------------------------------------------------------------------------------|----------------|--------------------------------------------------------------------------------------|------------------------|------------------------------------------|-------------------|
|                                             |                                                      | No SGTF (Delta)                                                                 | SGTF (Omicron) | No SGTF (Delta)                                                                      | SGTF (Omicron)         | Unadjusted                               | Adjusted          |
| Onset of respiratory symptoms               | Cases tested in outpatient settings without symptoms | 574 (13.3)                                                                      | 5,720 (11.6)   | 0.20 (574/280,118)                                                                   | 0.18 (5,720/3,109,842) | 0.95 (0.87, 1.04)                        | 0.88 (0.81, 0.96) |
|                                             | All cases without symptoms at point of testing       | 581 (13.4)                                                                      | 5,787 (11.7)   | 0.21 (581/281,047)                                                                   | 0.19 (5,787/3,119,788) | 0.95 (0.87, 1.04)                        | 0.89 (0.81, 0.97) |
| Any hospital admission                      | Cases tested in outpatient settings without symptoms | 28 (6.5)                                                                        | 179 (3.6)      | 2.27 (28/123,523)                                                                    | 1.26 (179/1,416,427)   | 0.57 (0.38, 0.86)                        | 0.69 (0.46, 1.05) |
|                                             | All cases without symptoms at point of testing       | 45 (10.4)                                                                       | 356 (7.2)      | 3.64 (45/123,532)                                                                    | 2.51 (356/1,416,516)   | 0.71 (0.52, 0.98)                        | 0.83 (0.60, 1.15) |
| Symptomatic hospital admission <sup>1</sup> | Cases tested in outpatient settings without symptoms | 13 (3.0)                                                                        | 66 (1.3)       | 1.05 (13/123,523)                                                                    | 0.47 (66/1,416,427)    | 0.53 (0.35, 0.80)                        | 0.65 (0.43, 0.98) |
|                                             | All cases without symptoms at point of testing       | 13 (3.0)                                                                        | 66 (1.3)       | 1.05 (13/123,532)                                                                    | 0.47 (66/1,416,516)    | 0.53 (0.35, 0.80)                        | 0.65 (0.43, 0.98) |
| ICU admission                               | Cases tested in outpatient settings without symptoms | 1 (0.2)                                                                         | 8 (0.2)        | 0.04 (1/251,816)                                                                     | 0.03 (8/2,885,008)     | 0.59 (0.07, 4.70)                        | --                |
|                                             | All cases without symptoms at point of testing       | 1 (0.2)                                                                         | 8 (0.2)        | 0.04 (1/252,819)                                                                     | 0.03 (8/2,895,452)     | 0.59 (0.07, 4.71)                        | --                |
| Mechanical ventilation                      | Cases tested in outpatient settings without symptoms | 0 (0.0)                                                                         | 4 (0.1)        | 0.00 (0/251,978)                                                                     | 0.01 (4/2,885,243)     | --                                       | --                |
|                                             | All cases without symptoms at point of testing       | 0 (0.0)                                                                         | 4 (0.1)        | 0.00 (0/252,981)                                                                     | 0.01 (4/2,895,686)     | --                                       | --                |
| Death                                       | Cases tested in outpatient settings without symptoms | 0 (0.0)                                                                         | 0 (0.0)        | 0.00 (0/251,978)                                                                     | 0.00 (0/2,885,381)     | --                                       | --                |
|                                             | All cases without symptoms at point of testing       | 0 (0.0)                                                                         | 0 (0.0)        | 0.00 (0/252,981)                                                                     | 0.00 (0/2,895,824)     | --                                       | --                |

SGTF: S gene target failure, here interpreted as a proxy for SARS-CoV-2 variant; CI: confidence interval.

Symptoms data were collected from free-text fields of patient EHRs, including data from clinical notes and from responses to questionnaires addressing symptoms in the 14 days before testing which all patients must complete to receive a test. Note that because lengths of follow-up differ between SGTF and non-SGTF cases, clinical risk periods over which cumulative events and event rates are summarized may differ between the two case populations.

<sup>1</sup>We define symptomatic hospital admissions as those occurring among cases with respiratory symptom onset dates on or ≤14 days before the date of admission.

**Table S9: Comparison of associations of SGTF with clinical outcomes across differing missing-data analysis strategies, 15 December, 2021 to 17 January, 2022.**

| Outcome                                     | Case population <sup>1</sup>        | Primary analysis: Adjusted hazard ratio (95% CI), Omicron vs. Delta | Complete case analysis: Adjusted hazard ratio (95% CI), Omicron vs. Delta | Participants enrolled ≥1 year: Adjusted hazard ratio (95% CI), Omicron vs. Delta |
|---------------------------------------------|-------------------------------------|---------------------------------------------------------------------|---------------------------------------------------------------------------|----------------------------------------------------------------------------------|
| Any hospital admission                      | Cases tested in outpatient settings | 0.59 (0.51, 0.69)                                                   | 0.65 (0.55, 0.76)                                                         | 0.59 (0.51, 0.70)                                                                |
|                                             | All cases                           | 0.61 (0.54, 0.68)                                                   | 0.66 (0.58, 0.75)                                                         | 0.62 (0.55, 0.70)                                                                |
| Symptomatic hospital admission <sup>1</sup> | Cases tested in outpatient settings | 0.59 (0.51, 0.68)                                                   | 0.64 (0.54, 0.75)                                                         | 0.59 (0.50, 0.69)                                                                |
|                                             | All cases                           | 0.55 (0.49, 0.62)                                                   | 0.61 (0.53, 0.70)                                                         | 0.56 (0.49, 0.64)                                                                |
| ICU admission                               | Cases tested in outpatient settings | 0.50 (0.29, 0.87)                                                   | 0.53 (0.30, 0.95)                                                         | 0.51 (0.29, 0.91)                                                                |
|                                             | All cases                           | 0.48 (0.29, 0.81)                                                   | 0.50 (0.29, 0.87)                                                         | 0.52 (0.29, 0.92)                                                                |
| Mechanical ventilation                      | Cases tested in outpatient settings | 0.36 (0.18, 0.72)                                                   | 0.32 (0.16, 0.65)                                                         | 0.32 (0.16, 0.65)                                                                |
|                                             | All cases                           | 0.32 (0.17, 0.62)                                                   | 0.30 (0.15, 0.61)                                                         | 0.34 (0.17, 0.68)                                                                |
| Death                                       | Cases tested in outpatient settings | 0.21 (0.10, 0.44)                                                   | 0.18 (0.08, 0.39)                                                         | 0.20 (0.09, 0.42)                                                                |
|                                             | All cases                           | 0.21 (0.10, 0.44)                                                   | 0.18 (0.08, 0.40)                                                         | 0.20 (0.09, 0.43)                                                                |

SGTF: S gene target failure, here interpreted as a proxy for SARS-CoV-2 variant; CI: confidence interval. Adjusted Cox proportional hazards models control for all variables listed in **Table S2**, with strata for testing date.

<sup>1</sup>We define symptomatic hospital admissions as those occurring among cases with respiratory symptom onset dates on or ≤14 days before the date of admission.

**Table S10: Association of SGTF infection status with symptomatic hospitalization within various patient subgroups, 15 December, 2021 to 17 January, 2022.**

| Characteristic                   | Cumulative events over observed follow-up, <i>n</i> (total per 1000 cases) |                | Symptomatic hospitalization rate per 10,000 person-days ( <i>n</i> of events/person-days at risk) |                     | Hazard ratio (95% CI), Omicron vs. Delta |                   |
|----------------------------------|----------------------------------------------------------------------------|----------------|---------------------------------------------------------------------------------------------------|---------------------|------------------------------------------|-------------------|
|                                  | No SGTF (Delta)                                                            | SGTF (Omicron) | No SGTF (Delta)                                                                                   | SGTF (Omicron)      | Unadjusted                               | Adjusted          |
| Age                              |                                                                            |                |                                                                                                   |                     |                                          |                   |
| 0-1 years                        | 3 (4.6)                                                                    | 4 (1.5)        | 1.6 (3/18,842)                                                                                    | 0.5 (4/74,660)      | 0.44 (0.09, 2.28)                        | --                |
| 2-4 years                        | 0 (0.0)                                                                    | 4 (0.8)        | 0.0 (0/21,921)                                                                                    | 0.3 (4/149,272)     | --                                       | --                |
| 5-9 years                        | 3 (2.3)                                                                    | 9 (0.7)        | 0.8 (3/38,152)                                                                                    | 0.3 (9/353,778)     | 0.31 (0.08, 1.19)                        | --                |
| 10-19 years                      | 6 (1.9)                                                                    | 18 (0.6)       | 0.6 (6/92,954)                                                                                    | 0.2 (18/824,353)    | 0.34 (0.13, 0.89)                        | 0.46 (0.23, 0.91) |
| 20-29 years                      | 15 (4.8)                                                                   | 150 (4.0)      | 1.7 (15/88,597)                                                                                   | 1.4 (150/1,087,778) | 0.87 (0.51, 1.48)                        | 1.01 (0.65, 1.55) |
| 30-39 years                      | 31 (7.9)                                                                   | 228 (5.0)      | 2.7 (31/112,945)                                                                                  | 1.8 (228/1,299,085) | 0.76 (0.51, 1.12)                        | 0.79 (0.58, 1.06) |
| 40-49 years                      | 38 (10.1)                                                                  | 129 (3.4)      | 3.5 (38/107,985)                                                                                  | 1.2 (128/1,086,231) | 0.40 (0.28, 0.59)                        | 0.44 (0.33, 0.60) |
| 50-59 years                      | 44 (13.3)                                                                  | 116 (4.0)      | 4.7 (44/94,621)                                                                                   | 1.4 (116/842,004)   | 0.36 (0.25, 0.52)                        | 0.49 (0.37, 0.66) |
| 60-69 years                      | 43 (21.8)                                                                  | 107 (6.8)      | 7.7 (43/56,024)                                                                                   | 2.4 (107/453,494)   | 0.36 (0.25, 0.51)                        | 0.38 (0.29, 0.50) |
| 70-79 years                      | 29 (36.2)                                                                  | 77 (12.9)      | 12.8 (29/22,600)                                                                                  | 4.5 (77/170,397)    | 0.40 (0.26, 0.63)                        | 0.63 (0.43, 0.19) |
| ≥80 years                        | 12 (45.5)                                                                  | 35 (22.4)      | 16.3 (12/7,383)                                                                                   | 7.9 (35/44,436)     | 0.60 (0.30, 1.23)                        | 0.77 (0.45, 1.30) |
| Sex                              |                                                                            |                |                                                                                                   |                     |                                          |                   |
| Female                           | 119 (9.2)                                                                  | 556 (4.5)      | 3.2 (119/370,374)                                                                                 | 1.6 (556/3,547,248) | 0.54 (0.44, 0.67)                        | 0.66 (0.57, 0.77) |
| Male                             | 107 (10.3)                                                                 | 322 (3.2)      | 3.6 (107/297,256)                                                                                 | 1.1 (322/2,866,168) | 0.37 (0.30, 0.47)                        | 0.53 (0.44, 0.64) |
| Charlson comorbidity index       |                                                                            |                |                                                                                                   |                     |                                          |                   |
| 0                                | 126 (6.8)                                                                  | 495 (2.7)      | 2.4 (126/531,196)                                                                                 | 0.9 (495/5,225,503) | 0.47 (0.38, 0.57)                        | 0.64 (0.54, 0.76) |
| 1-2                              | 59 (15.4)                                                                  | 228 (6.6)      | 5.4 (59/109,428)                                                                                  | 2.3 (228/997,950)   | 0.51 (0.38, 0.68)                        | 0.58 (0.46, 0.73) |
| 3-5                              | 22 (31.0)                                                                  | 97 (19.2)      | 11.0 (22/20,036)                                                                                  | 6.7 (97/144,063)    | 0.61 (0.38, 0.99)                        | 0.56 (0.40, 0.79) |
| ≥6                               | 19 (73.9)                                                                  | 58 (35.6)      | 27.3 (19/6,970)                                                                                   | 12.6 (58/45,900)    | 0.50 (0.29, 0.85)                        | 0.76 (0.49, 1.18) |
| Previous infection               |                                                                            |                |                                                                                                   |                     |                                          |                   |
| No documented previous infection | 225 (9.7)                                                                  | 874 (3.9)      | 3.4 (225/665,208)                                                                                 | 1.4 (874/6,379,984) | 0.46 (0.40, 0.54)                        | 0.60 (0.54, 0.68) |
| Documented previous infection    | 1 (11.9)                                                                   | 4 (3.4)        | 4.1 (1/2,422)                                                                                     | 1.2 (4/33,432)      | 0.27 (0.03, 2.44)                        | --                |
| Vaccination                      |                                                                            |                |                                                                                                   |                     |                                          |                   |
| Unvaccinated                     | 142 (14.5)                                                                 | 272 (4.2)      | 5.1 (142/279,328)                                                                                 | 1.4 (272/1,885,318) | 0.36 (0.29, 0.44)                        | 0.47 (0.39, 0.56) |
| Ad.26.COV2                       |                                                                            |                |                                                                                                   |                     |                                          |                   |
| Single dose                      | 9 (12.6)                                                                   | 24 (3.5)       | 4.4 (9/20,471)                                                                                    | 1.2 (24/197,871)    | 0.29 (0.13, 0.64)                        | 0.36 (0.19, 0.70) |
| With any booster dose            | 1 (5.9)                                                                    | 10 (4.3)       | 2.0 (1/4,910)                                                                                     | 1.5 (10/67,175)     | 0.91 (0.11, 7.65)                        | --                |
| BNT162b2 or mRNA-1273            |                                                                            |                |                                                                                                   |                     |                                          |                   |
| Single dose                      | 7 (10.8)                                                                   | 14 (2.2)       | 3.8 (7/18,476)                                                                                    | 0.8 (14/180,371)    | 0.25 (0.10, 0.63)                        | 0.32 (0.14, 0.76) |
| 2 doses (>180 days prior)        | 41 (5.5)                                                                   | 308 (3.8)      | 1.9 (41/215,679)                                                                                  | 1.3 (308/2,340,025) | 0.44 (0.15, 1.25)                        | 0.65 (0.26, 1.62) |
| 2 doses (91-180 days prior)      | 8 (5.0)                                                                    | 59 (3.2)       | 1.7 (8/46,119)                                                                                    | 1.1 (59/530,686)    | 0.72 (0.34, 1.53)                        | 0.71 (0.41, 1.23) |
| 2 doses (≤90 days prior)         | 5 (22.0)                                                                   | 8 (2.6)        | 2.8 (5/17,815)                                                                                    | 0.9 (22/246,212)    | 0.72 (0.52, 1.01)                        | 0.85 (0.66, 1.09) |
| 3 doses                          | 13 (5.8)                                                                   | 169 (5.0)      | 2.0 (13/64,832)                                                                                   | 1.7 (169/965,758)   | 0.91 (0.52, 1.61)                        | 0.78 (0.57, 1.09) |

SGTF: S gene target failure, here interpreted as a proxy for SARS-CoV-2 variant; CI: confidence interval. Adjusted Cox proportional hazards models control for all variables listed in **Table S2**, with strata for testing date. We define symptomatic hospital admissions as those occurring among cases with respiratory symptom onset dates on or ≤14 days before the date of admission.

**Table S11: Comparison of associations of SGTF with clinical outcomes defined on the basis of the adjusted hazard ratio or adjusted risk ratio, 15 December, 2021 to 17 January, 2022.**

| Outcome                                     | Case population <sup>1</sup>        | Primary analysis: Adjusted hazard ratio (95% CI), Omicron vs. Delta | Log binomial regression analysis: Risk ratio (95% CI), Omicron vs. Delta |
|---------------------------------------------|-------------------------------------|---------------------------------------------------------------------|--------------------------------------------------------------------------|
| Any hospital admission                      | Cases tested in outpatient settings | 0.59 (0.51, 0.69)                                                   | 0.63 (0.55, 0.72)                                                        |
|                                             | All cases                           | 0.61 (0.54, 0.68)                                                   | 0.67 (0.60, 0.75)                                                        |
| Symptomatic hospital admission <sup>1</sup> | Cases tested in outpatient settings | 0.59 (0.51, 0.68)                                                   | 0.63 (0.55, 0.72)                                                        |
|                                             | All cases                           | 0.55 (0.49, 0.62)                                                   | 0.60 (0.54, 0.68)                                                        |
| ICU admission                               | Cases tested in outpatient settings | 0.50 (0.29, 0.87)                                                   | 0.54 (0.31, 0.94)                                                        |
|                                             | All cases                           | 0.48 (0.29, 0.81)                                                   | 0.51 (0.30, 0.86)                                                        |
| Mechanical ventilation                      | Cases tested in outpatient settings | 0.36 (0.18, 0.72)                                                   | 0.35 (0.17, 0.71)                                                        |
|                                             | All cases                           | 0.32 (0.17, 0.62)                                                   | 0.32 (0.16, 0.62)                                                        |
| Death                                       | Cases tested in outpatient settings | 0.21 (0.10, 0.44)                                                   | 0.20 (0.10, 0.43)                                                        |
|                                             | All cases                           | 0.21 (0.10, 0.44)                                                   | 0.21 (0.10, 0.43)                                                        |

SGTF: S gene target failure, here interpreted as a proxy for SARS-CoV-2 variant; CI: confidence interval. Adjusted Cox proportional hazards and log binomial regression models control for all variables listed in **Table S2**, with strata and intercepts for testing date, respectively.

<sup>1</sup>We define symptomatic hospital admissions as those occurring among cases with respiratory symptom onset dates on or ≤14 days before the date of admission.

**Table S12: Occurrence of severe clinical outcomes among cases tested in outpatient settings with and without SGTF, 3 February to 17 March, 2022.**

| Outcome                                     | Cumulative events over observed follow-up<br>( <i>n</i> of events per 1000 cases) |              | Event rate per 10,000 person-days observed ( <i>n</i> of<br>events/person-days at risk) |                    | Hazard ratio (95% CI), BA.2 vs. BA.1* |                   |
|---------------------------------------------|-----------------------------------------------------------------------------------|--------------|-----------------------------------------------------------------------------------------|--------------------|---------------------------------------|-------------------|
|                                             | No SGTF (BA.2)                                                                    | SGTF (BA.1*) | No SGTF (BA.2)                                                                          | SGTF (BA.1*)       | Unadjusted                            | Adjusted          |
| Any hospital admission                      | 28 (14.7)                                                                         | 170 (13.3)   | 7.01 (28/39,965)                                                                        | 5.16 (170/329,302) | 1.38 (0.92, 2.07)                     | 1.26 (0.83, 1.92) |
| Symptomatic hospital admission <sup>1</sup> | 24 (12.6)                                                                         | 147 (11.5)   | 6.01 (24/39,965)                                                                        | 4.46 (147/329,302) | 1.42 (0.92, 2.20)                     | 1.29 (0.82, 2.03) |
| ICU admission                               | 1 (0.5)                                                                           | 6 (0.5)      | 0.21 (1/48,374)                                                                         | 0.15 (6/406,887)   | 1.63 (0.20, 13.8)                     | --                |
| Mechanical ventilation                      | 1 (0.5)                                                                           | 1 (0.1)      | 0.21 (1/48,374)                                                                         | 0.02 (1/406,982)   | --                                    | --                |
| Death                                       | 2 (1.0)                                                                           | 16 (1.3)     | 0.41 (2/48,367)                                                                         | 0.39 (16/406,769)  | 1.04 (0.24, 4.55)                     | 1.16 (0.25, 5.29) |

SGTF: S gene target failure, here interpreted as a proxy for SARS-CoV-2 variant; CI: confidence interval. Adjusted Cox proportional hazards models control for all variables listed in **Table S2**, with strata for testing date.

<sup>1</sup>We define symptomatic hospital admissions as those occurring among cases with respiratory symptom onset dates on or ≤14 days before the date of admission.



**Table S13: Association of various clinical and demographic characteristics with symptomatic hospital admission among cases with and without SGTF, 15 December, 2021 to 17 January, 2022.**

| Characteristic                            | Measure                            | Adjusted hazard ratio (95% CI)      |                             |                                     |                             |                                     |                             |
|-------------------------------------------|------------------------------------|-------------------------------------|-----------------------------|-------------------------------------|-----------------------------|-------------------------------------|-----------------------------|
|                                           |                                    | All cases                           |                             | SGTF cases (Omicron)                |                             | Non-SGTF cases (Delta)              |                             |
|                                           |                                    | Cases tested in outpatient settings | Cases tested in any setting | Cases tested in outpatient settings | Cases tested in any setting | Cases tested in outpatient settings | Cases tested in any setting |
| Age                                       | <1 year                            | 0.12 (0.04, 0.36)                   | 0.24 (0.12, 0.48)           | 0.12 (0.03, 0.48)                   | 0.19 (0.07, 0.52)           | 0.14 (0.02, 1.05)                   | 0.40 (0.14, 1.13)           |
|                                           | 1-4 years                          | 0.32 (0.16, 0.61)                   | 0.32 (0.18, 0.55)           | 0.37 (0.17, 0.79)                   | 0.29 (0.15, 0.58)           | 0.25 (0.05, 1.27)                   | 0.42 (0.17, 1.08)           |
|                                           | 5-9 years                          | 0.27 (0.14, 0.50)                   | 0.31 (0.19, 0.51)           | 0.28 (0.13, 0.57)                   | 0.38 (0.22, 0.65)           | 0.34 (0.10, 1.27)                   | 0.22 (0.08, 0.67)           |
|                                           | 10-19 years                        | 0.28 (0.19, 0.41)                   | 0.32 (0.24, 0.44)           | 0.28 (0.19, 0.43)                   | 0.33 (0.23, 0.46)           | 0.36 (0.16, 0.84)                   | 0.37 (0.20, 0.72)           |
|                                           | 20-29 years                        | 0.86 (0.71, 1.04)                   | 0.80 (0.68, 0.95)           | 0.88 (0.73, 1.08)                   | 0.83 (0.70, 0.99)           | 0.76 (0.43, 1.35)                   | 0.68 (0.42, 1.14)           |
|                                           | 30-39 years                        | ref.                                | ref.                        | ref.                                | ref.                        | ref.                                | ref.                        |
|                                           | 40-49 years                        | 0.76 (0.64, 0.92)                   | 0.82 (0.70, 0.96)           | 0.67 (0.54, 0.82)                   | 0.74 (0.62, 0.88)           | 1.49 (0.94, 2.35)                   | 1.39 (0.94, 2.06)           |
|                                           | 50-59 years                        | 0.85 (0.70, 1.03)                   | 0.94 (0.80, 1.11)           | 0.71 (0.57, 0.88)                   | 0.85 (0.71, 1.03)           | 2.01 (1.26, 3.15)                   | 1.63 (1.09, 2.43)           |
|                                           | 60-69 years                        | 1.34 (1.09, 1.65)                   | 1.37 (1.15, 1.62)           | 1.03 (0.81, 1.31)                   | 1.08 (0.88, 1.33)           | 3.54 (2.22, 5.60)                   | 3.13 (2.09, 4.65)           |
|                                           | 70-79 years                        | 1.99 (1.55, 2.56)                   | 1.93 (1.56, 2.40)           | 1.55 (1.16, 2.06)                   | 1.54 (1.21, 1.97)           | 5.56 (3.23, 9.77)                   | 4.72 (2.94, 7.63)           |
|                                           | ≥80 years                          | 2.89 (2.08, 3.99)                   | 2.79 (2.11, 3.71)           | 2.58 (1.76, 3.77)                   | 2.44 (1.75, 3.42)           | 5.44 (2.63, 11.4)                   | 5.37 (2.97, 9.78)           |
| Sex                                       | Female                             | ref.                                | ref.                        | ref.                                | ref.                        | ref.                                | ref.                        |
|                                           | Male                               | 1.04 (0.92, 1.18)                   | 1.02 (0.92, 1.14)           | 1.01 (0.88, 1.16)                   | 1.00 (0.89, 1.12)           | 1.19 (0.91, 1.54)                   | 1.15 (0.92, 1.44)           |
| Race/ethnicity                            | White                              | ref.                                | ref.                        | ref.                                | ref.                        | ref.                                | ref.                        |
|                                           | Black                              | 0.99 (0.79, 1.24)                   | 1.18 (0.98, 1.41)           | 0.97 (0.76, 1.26)                   | 1.18 (0.97, 1.44)           | 1.19 (0.70, 1.97)                   | 1.33 (0.89, 1.99)           |
|                                           | Hispanic                           | 1.14 (0.99, 1.33)                   | 1.05 (0.92, 1.19)           | 1.13 (0.95, 1.35)                   | 1.05 (0.91, 1.22)           | 1.17 (0.87, 1.60)                   | 1.04 (0.80, 1.35)           |
|                                           | Asian/Pacific islander             | 1.44 (1.15, 1.80)                   | 1.23 (1.01, 1.48)           | 1.40 (1.10, 1.79)                   | 1.25 (1.01, 1.55)           | 1.46 (0.84, 2.49)                   | 0.96 (0.58, 1.59)           |
|                                           | Other, mixed race, or unknown race | 0.70 (0.50, 0.98)                   | 0.89 (0.61, 1.04)           | 0.55 (0.37, 0.84)                   | 0.71 (0.52, 0.97)           | 1.32 (0.75, 2.29)                   | 1.11 (0.69, 1.79)           |
| Community median income                   | Per 1-log increase                 | 0.99 (0.85, 1.14)                   | 0.93 (0.83, 1.05)           | 0.97 (0.83, 1.15)                   | 0.94 (0.82, 1.07)           | 1.01 (0.72, 1.42)                   | 0.90 (0.69, 1.15)           |
| Cigarette smoking                         | Never smoker                       | ref.                                | ref.                        | ref.                                | ref.                        | ref.                                | ref.                        |
|                                           | Current smoker                     | 0.97 (0.75, 1.24)                   | 0.87 (0.70, 1.10)           | 0.99 (0.74, 1.32)                   | 0.89 (0.69, 1.14)           | 0.88 (0.51, 1.51)                   | 0.80 (0.49, 1.28)           |
|                                           | Former smoker                      | 1.01 (0.87, 1.17)                   | 0.98 (0.86, 1.11)           | 1.04 (0.88, 1.23)                   | 0.96 (0.83, 1.11)           | 0.93 (0.67, 1.28)                   | 1.07 (0.82, 1.39)           |
| Body mass index                           | Underweight                        | 0.80 (0.51, 1.27)                   | 0.94 (0.66, 1.33)           | 0.85 (0.50, 1.45)                   | 0.90 (0.60, 1.36)           | 0.72 (0.26, 1.96)                   | 1.15 (0.58, 2.26)           |
|                                           | Normal weight                      | ref.                                | ref.                        | ref.                                | ref.                        | ref.                                | ref.                        |
|                                           | Overweight                         | 1.35 (1.13, 1.62)                   | 1.18 (1.02, 1.37)           | 1.37 (1.13, 1.67)                   | 1.20 (1.02, 1.41)           | 1.38 (0.91, 2.02)                   | 1.17 (0.84, 1.63)           |
|                                           | Obese                              | 1.60 (1.36, 1.90)                   | 1.30 (1.14, 1.50)           | 1.59 (1.31, 1.92)                   | 1.30 (1.12, 1.52)           | 1.64 (1.10, 2.41)                   | 1.28 (0.93, 1.77)           |
| Healthcare utilization: outpatient visits | 0-4                                | ref.                                | ref.                        | ref.                                | ref.                        | ref.                                | ref.                        |
|                                           | 5-9                                | 1.89 (1.51, 2.34)                   | 1.69 (1.41, 2.03)           | 1.98 (1.53, 2.55)                   | 1.79 (1.45, 2.22)           | 1.52 (0.96, 2.38)                   | 1.32 (0.92, 1.91)           |
|                                           | 10-14                              | 2.42 (1.92, 3.06)                   | 2.07 (1.70, 2.51)           | 2.66 (2.03, 3.44)                   | 2.27 (1.81, 2.84)           | 1.76 (1.07, 2.88)                   | 1.56 (1.05, 2.33)           |
|                                           | 15-19                              | 2.39 (1.85, 3.09)                   | 2.07 (1.68, 2.57)           | 2.35 (1.76, 3.14)                   | 2.24 (1.75, 2.85)           | 2.52 (1.51, 4.14)                   | 1.65 (1.07, 2.54)           |
|                                           | ≥20-29                             | 3.31 (2.65, 4.13)                   | 2.61 (2.16, 3.16)           | 3.64 (2.82, 4.71)                   | 2.95 (2.36, 3.68)           | 2.29 (1.41, 3.71)                   | 1.70 (1.14, 2.52)           |
| Healthcare utilization: ED visits         | 0                                  | ref.                                | ref.                        | ref.                                | ref.                        | ref.                                | ref.                        |
|                                           | 1                                  | 1.38 (1.20, 1.59)                   | 1.37 (1.21, 1.55)           | 1.31 (1.11, 1.53)                   | 1.32 (1.15, 1.51)           | 1.61 (1.19, 2.18)                   | 1.55 (1.19, 2.00)           |
|                                           | 2                                  | 1.52 (1.24, 1.87)                   | 1.43 (1.19, 1.71)           | 1.38 (1.09, 1.73)                   | 1.34 (1.09, 1.65)           | 2.12 (1.42, 3.18)                   | 1.84 (1.28, 2.65)           |
|                                           | ≥3                                 | 1.07 (0.85, 1.35)                   | 1.17 (0.97, 1.41)           | 1.06 (0.82, 1.37)                   | 1.13 (0.91, 1.40)           | 1.16 (0.68, 2.02)                   | 1.43 (0.93, 2.19)           |
| Healthcare utilization:                   |                                    |                                     |                             |                                     |                             |                                     |                             |

|                            |                                                   |                   |                   |                   |                   |                   |                   |
|----------------------------|---------------------------------------------------|-------------------|-------------------|-------------------|-------------------|-------------------|-------------------|
| inpatient admissions       | 0                                                 | ref.              | ref.              | ref.              | ref.              | ref.              | ref.              |
|                            | 1                                                 | 11.9 (10.2, 13.9) | 14.5 (12.6, 16.7) | 13.7 (11.5, 16.4) | 16.7 (14.4, 19.4) | 7.38 (5.02, 10.8) | 8.51 (6.23, 11.6) |
|                            | 2                                                 | 12.0 (9.69, 14.8) | 14.9 (12.5, 17.8) | 14.2 (11.2, 17.8) | 17.6 (14.4, 21.3) | 6.29 (3.78, 10.5) | 8.06 (5.26, 12.3) |
|                            | ≥3                                                | 18.8 (15.7, 22.6) | 24.9 (21.4, 29.0) | 22.6 (18.5, 27.4) | 29.5 (25.0, 34.8) | 8.60 (5.14, 14.6) | 11.9 (7.87, 17.8) |
|                            | Charlson comorbidity index                        |                   |                   |                   |                   |                   |                   |
|                            | 0                                                 | ref.              | ref.              | ref.              | ref.              | ref.              | ref.              |
|                            | 1-2                                               | 1.02 (0.87, 1.18) | 0.93 (0.81, 1.05) | 1.02 (0.87, 1.21) | 0.92 (0.80, 1.07) | 1.01 (0.72, 1.41) | 0.95 (0.71, 1.27) |
|                            | 3-5                                               | 1.39 (1.10, 1.74) | 1.17 (0.95, 1.42) | 1.41 (1.10, 1.83) | 1.21 (0.97, 1.50) | 1.33 (0.81, 2.21) | 1.09 (0.69, 1.67) |
|                            | ≥6                                                | 1.58 (1.19, 2.08) | 1.33 (1.04, 1.69) | 1.49 (1.08, 2.05) | 1.25 (0.96, 1.65) | 2.24 (1.21, 4.11) | 1.68 (1.00, 2.80) |
| Prior SARS-CoV-2 infection | No documented previous infection                  | ref.              | ref.              | ref.              | ref.              | ref.              | ref.              |
|                            | Documented previous infection                     | 0.48 (0.22, 1.07) | 0.49 (0.24, 0.97) | 0.52 (0.22, 1.26) | 0.56 (0.27, 1.19) | 0.50 (0.07, 3.92) | 0.32 (0.04, 2.31) |
| COVID-19 vaccination       | Unvaccinated                                      | ref.              | ref.              | ref.              | ref.              | ref.              | ref.              |
|                            | Ad.26.COVS.S—1 dose                               | 0.48 (0.34, 0.67) | 0.61 (0.47, 0.80) | 0.54 (0.36, 0.79) | 0.67 (0.49, 0.93) | 0.39 (0.20, 0.77) | 0.52 (0.30, 0.89) |
|                            | Ad.26.COVS.S—with any booster dose                | 0.34 (0.19, 0.62) | 0.43 (0.37, 0.50) | 0.46 (0.25, 0.84) | 0.61 (0.38, 0.99) | 0.11 (0.01, 0.76) | 0.20 (0.05, 0.84) |
|                            | BNT162b2 or mRNA-1273—1 dose                      | 0.51 (0.34, 0.78) | 0.59 (0.41, 0.82) | 0.46 (0.27, 0.77) | 0.59 (0.39, 0.89) | 0.69 (0.35, 1.35) | 0.61 (0.32, 1.15) |
|                            | BNT162b2 or mRNA-1273—2 doses (≥180 days prior)   | 0.46 (0.32, 0.66) | 0.48 (0.43, 0.55) | 0.52 (0.44, 0.61) | 0.60 (0.52, 0.69) | 0.41 (0.16, 1.01) | 0.32 (0.13, 0.78) |
|                            | BNT162b2 or mRNA-1273—2 doses (91-180 days prior) | 0.38 (0.30, 0.49) | 0.45 (0.37, 0.56) | 0.43 (0.32, 0.56) | 0.50 (0.40, 0.64) | 0.27 (0.14, 0.54) | 0.33 (0.19, 0.58) |
|                            | BNT162b2 or mRNA-1273—2 doses (≤90 days prior)    | 0.41 (0.36, 0.47) | 0.43 (0.30, 0.60) | 0.51 (0.34, 0.76) | 0.48 (0.33, 0.70) | 0.17 (0.12, 0.24) | 0.23 (0.17, 0.30) |
|                            | BNT162b2 or mRNA-1273—3 doses                     | 0.33 (0.28, 0.40) | 0.43 (0.37, 0.50) | 0.43 (0.35, 0.52) | 0.54 (0.46, 0.64) | 0.14 (0.08, 0.24) | 0.19 (0.12, 0.28) |

SGTF: S gene target failure, here interpreted as a proxy for SARS-CoV-2 variant; CI: confidence interval. Adjusted Cox proportional hazards models control for all variables listed in **Table S2**, with strata for testing date. We define symptomatic hospital admissions as those occurring among cases with respiratory symptom onset dates on or ≤14 days before the date of admission.

**Table S14: Occurrence of severe clinical outcomes among cases with and without SGTF, stratified by vaccination status, 15 December, 2021 to 17 January, 2022.**

| Outcome                                     | Vaccination status                                | Number of cases |                | Cumulative events over observed follow-up (n of events per 1000 cases) |                | Hazard ratio (95% CI), Omicron vs. Delta |                   |
|---------------------------------------------|---------------------------------------------------|-----------------|----------------|------------------------------------------------------------------------|----------------|------------------------------------------|-------------------|
|                                             |                                                   | No SGTF (Delta) | SGTF (Omicron) | No SGTF (Delta)                                                        | SGTF (Omicron) | Unadjusted                               | Adjusted          |
| Any hospital admission                      | Unvaccinated                                      | 9,802           | 65,480         | 149 (15.2)                                                             | 316 (4.8)      | 0.36 (0.29, 0.43)                        | 0.40 (0.33, 0.49) |
|                                             | Ad.26.COVID.S—1 dose                              | 717             | 6,874          | 9 (12.6)                                                               | 28 (4.1)       | 0.36 (0.17, 0.76)                        | 0.47 (0.22, 1.00) |
|                                             | Ad.26.COVID.S—with any booster dose               | 170             | 2,329          | 1 (5.9)                                                                | 11 (4.7)       | 0.93 (0.12, 7.31)                        | 0.26 (0.11, 0.59) |
|                                             | BNT162b2 or mRNA-1273—1 dose                      | 646             | 6,266          | 8 (12.4)                                                               | 15 (2.4)       | 0.19 (0.08, 0.43)                        | 0.60 (0.23, 1.58) |
|                                             | BNT162b2 or mRNA-1273—2 doses (≥180 days prior)   | 7,492           | 81,266         | 44 (5.9)                                                               | 341 (4.2)      | 0.76 (0.56, 1.04)                        | 0.70 (0.35, 1.40) |
|                                             | BNT162b2 or mRNA-1273—2 doses (91-180 days prior) | 1,600           | 18,409         | 9 (5.6)                                                                | 64 (3.5)       | 0.69 (0.34, 1.38)                        | 1.05 (0.77, 1.43) |
|                                             | BNT162b2 or mRNA-1273—2 doses (≤90 days prior)    | 622             | 8,548          | 5 (8.0)                                                                | 27 (3.2)       | 0.44 (0.17, 1.13)                        | 0.99 (0.61, 1.61) |
|                                             | BNT162b2 or mRNA-1273—3 doses                     | 2,256           | 33,516         | 16 (7.1)                                                               | 189 (5.6)      | 0.73 (0.45, 1.17)                        | 0.59 (0.51, 0.69) |
| Symptomatic hospital admission <sup>1</sup> | Unvaccinated                                      | 9,802           | 65,480         | 142 (14.5)                                                             | 272 (4.2)      | 0.35 (0.29, 0.43)                        | 0.40 (0.33, 0.49) |
|                                             | Ad.26.COVID.S—1 dose                              | 717             | 6,874          | 9 (12.6)                                                               | 24 (3.5)       | 0.36 (0.17, 0.76)                        | 0.47 (0.22, 1.00) |
|                                             | Ad.26.COVID.S—with any booster dose               | 170             | 2,329          | 1 (5.9)                                                                | 10 (4.3)       | 0.94 (0.12, 7.28)                        | 0.26 (0.11, 0.59) |
|                                             | BNT162b2 or mRNA-1273—1 dose                      | 646             | 6,266          | 7 (10.8)                                                               | 14 (2.2)       | 0.19 (0.08, 0.43)                        | 0.59 (0.22, 1.53) |
|                                             | BNT162b2 or mRNA-1273—2 doses (≥180 days prior)   | 7,492           | 81,266         | 41 (5.5)                                                               | 308 (3.8)      | 0.75 (0.55, 1.03)                        | 0.69 (0.34, 1.39) |
|                                             | BNT162b2 or mRNA-1273—2 doses (91-180 days prior) | 1,600           | 18,409         | 8 (5.0)                                                                | 59 (3.2)       | 0.68 (0.34, 1.37)                        | 1.03 (0.76, 1.41) |
|                                             | BNT162b2 or mRNA-1273—2 doses (≤90 days prior)    | 622             | 8,548          | 5 (1.0)                                                                | 22 (2.6)       | 0.42 (0.16, 1.10)                        | 0.97 (0.60, 1.58) |
|                                             | BNT162b2 or mRNA-1273—3 doses                     | 2,256           | 33,516         | 13 (5.8)                                                               | 169 (5.0)      | 0.72 (0.44, 1.15)                        | 0.59 (0.51, 0.68) |
| ICU admission                               | Unvaccinated                                      | 9,802           | 65,480         | 20 (2.0)                                                               | 22 (0.3)       | 0.21 (0.11, 0.39)                        | 0.34 (0.17, 0.66) |
|                                             | Any COVID-19 vaccination                          | 13,503          | 157,208        | 4 (0.3)                                                                | 28 (0.2)       | 0.68 (0.24, 1.95)                        | 0.95 (0.33, 2.76) |
| Mechanical ventilation                      | Unvaccinated                                      | 9,802           | 65,480         | 16 (1.6)                                                               | 12 (0.2)       | 0.14 (0.06, 0.31)                        | 0.24 (0.12, 0.48) |
|                                             | Any COVID-19 vaccination                          | 13,503          | 157,208        | 1 (0.1)                                                                | 12 (0.1)       | 1.18 (0.15, 8.95)                        | 1.50 (0.56, 3.99) |
| Death                                       | Unvaccinated                                      | 9,802           | 65,480         | 12 (1.2)                                                               | 5 (0.1)        | 0.07 (0.03, 0.22)                        | 0.14 (0.07, 0.28) |
|                                             | Any COVID-19 vaccination                          | 13,503          | 157,208        | 7 (0.5)                                                                | 12 (0.1)       | 0.16 (0.06, 0.42)                        | 0.25 (0.09, 0.70) |

SGTF: S gene target failure, here interpreted as a proxy for SARS-CoV-2 variant; CI: confidence interval. Adjusted Cox proportional hazards models control for all variables listed in **Table S2**, with strata for testing date. Estimates are presented visually in **Figure 3** and **Figure S3**.

<sup>1</sup>We define symptomatic hospital admissions as those occurring among cases with respiratory symptom onset dates on or ≤14 days before the date of admission.

**Table S15: Dates of change in slopes for Cox proportional hazards models relating testing date to risk of severe clinical outcomes.**

| <b>Endpoint</b>                | <b>Quantile</b> | <b>Changepoint date (95% CI)</b>       |
|--------------------------------|-----------------|----------------------------------------|
| Any hospital admission         | Point estimate  | 22 December, 2021                      |
|                                | 25-75%ile       | 20 December, 2021 to 24 December, 2021 |
|                                | 2.5-97.5%ile    | 13 December, 2021 to 3 January, 2022   |
| Symptomatic hospital admission | Point estimate  | 23 December, 2021                      |
|                                | 25-75%ile       | 21 December, 2021 to 24 December, 2021 |
|                                | 2.5-97.5%ile    | 13 December, 2021 to 4 January, 2022   |
| ICU admission                  | Point estimate  | 13 December, 2021                      |
|                                | 25-75%ile       | 7 December, 2021 to 17 December, 2021  |
|                                | 2.5-97.5%ile    | 19 November, 2021 to 3 January, 2022   |
| Mortality                      | Point estimate  | 8 December, 2021                       |
|                                | 25-75%ile       | 4 December, 2021 to 11 December, 2021  |
|                                | 2.5-97.5%ile    | 21 November, 2021 to 28 December, 2021 |

CI: Confidence interval. Adjusted Cox proportional hazards models fitted with 0, 1, or 2 changepoints (allowed for each date from 15 November, 2021 to 10 January, 2022) were sampled according to posterior weights. Daily adjusted hazards (controlling for all variables listed in **Table S2**) are illustrated in the inset panels to **Figure 4**.

**Table S16: Disposition at completion of hospitalization among patients with completed hospital stays.**

| Discharge disposition                                 | Number of cases (%)                   |                |                              |               |
|-------------------------------------------------------|---------------------------------------|----------------|------------------------------|---------------|
|                                                       | 15 December, 2021 to 17 January, 2022 |                | 3 February to 17 March, 2022 |               |
|                                                       | No SGTF (Delta)                       | SGTF (Omicron) | No SGTF (BA.2)               | SGTF (BA.1*)  |
|                                                       | <i>N</i> =208                         | <i>N</i> =703  | <i>N</i> =23                 | <i>N</i> =146 |
| Home (self-care)                                      | 138 (66.3)                            | 582 (82.8)     | 20 (87.0)                    | 124 (84.9)    |
| Home with skilled care provision                      | 22 (10.6)                             | 36 (5.1)       | 2 (8.7)                      | 8 (5.5)       |
| Discharged against medical advice                     | 4 (1.9)                               | 1 (0.1)        | 0 (0.0)                      | 2 (1.4)       |
| SNF, Residential facility, or rehabilitation facility | 2 (1.0)                               | 3 (0.4)        | 0 (0.0)                      | 2 (1.4)       |
| Other acute inpatient hospital                        | 2 (1.0)                               | 2 (0.3)        | 0 (0.0)                      | 1 (0.7)       |
| Hospice care/in-hospital death                        | 2 (1.0)                               | 3 (0.4)        | 0 (0.0)                      | 0 (0.0)       |
| Final disposition not recorded                        | 38 (18.3)                             | 76 (10.8)      | 1 (4.3)                      | 9 (6.2)       |

SGTF: S gene target failure. Cases in the table are subset to those tested in outpatient settings and admitted within the indicated date ranges, with symptoms onset on or ≤14 days before this date.

**Table S17: Association of SGTF with time to completion of hospital stay among outpatient-diagnosed cases with symptoms onset on or before admission date, 15 December, 2021 to 17 January, 2022 and 3 February to 17 March, 2022.**

| Comparison and period                                                       | Hazard ratio (95% CI) |                   |
|-----------------------------------------------------------------------------|-----------------------|-------------------|
|                                                                             | Unadjusted            | Adjusted          |
| Omicron (SGTF) vs. Delta (No SGTF)<br>15 December, 2021 to 17 January, 2022 | 1.46 (1.20, 1.77)     | 1.24 (0.99, 1.57) |
| BA.2 (No SGTF) vs. BA.1* (SGTF)<br>3 February to 17 March, 2022             | 1.02 (0.61, 1.70)     | 0.95 (0.41, 2.22) |

SGTF: S gene target failure, here interpreted as a proxy for SARS-CoV-2 variant; CI: confidence interval. Adjusted Cox proportional hazards models control for all variables listed in **Table S2**, with strata for admission date.

**Table S18: Attributes of outpatient cases with samples processed using the ThermoFisher TaqPath COVID-19 Combo Kit or other assays, 1 November, 2021 to 17 March, 2022.**

| Characteristic                                                     | Number of cases (%)                                  |                         |
|--------------------------------------------------------------------|------------------------------------------------------|-------------------------|
|                                                                    | ThermoFisher TaqPath COVID-19 combo kit<br>N=329,195 | Other assay<br>N=60,701 |
| Age <sup>1</sup>                                                   |                                                      |                         |
| <1 year                                                            | 2,449 (0.7)                                          | 1,024 (1.7)             |
| 1-4 years                                                          | 1,024 (1.7)                                          | 11,381 (3.5)            |
| 5-9 years                                                          | 19,606 (6.0)                                         | 2,724 (4.5)             |
| 10-19 years                                                        | 42,306 (12.9)                                        | 6,326 (10.4)            |
| 20-29 years                                                        | 50,660 (15.4)                                        | 8,250 (13.6)            |
| 30-39 years                                                        | 64,575 (19.6)                                        | 10,476 (17.3)           |
| 40-49 years                                                        | 54,743 (16.6)                                        | 8,678 (14.3)            |
| 50-59 years                                                        | 43,474 (13.2)                                        | 7,840 (12.9)            |
| 60-69 years                                                        | 25,467 (7.7)                                         | 5,356 (8.8)             |
| 70-79 years                                                        | 10,168 (3.1)                                         | 3,071 (5.1)             |
| ≥80 years                                                          | 2,888 (0.9)                                          | 1,762 (2.9)             |
| Sex                                                                |                                                      |                         |
| Female                                                             | 181,095 (55.0)                                       | 34,740 (57.2)           |
| Male                                                               | 148,100 (42.8)                                       | 25,961 (42.8)           |
| Race/ethnicity                                                     |                                                      |                         |
| White, non-Hispanic                                                | 77,178 (23.4)                                        | 12,424 (20.5)           |
| Black, non-Hispanic                                                | 23,977 (7.3)                                         | 6,962 (11.5)            |
| Hispanic                                                           | 164,253 (49.9)                                       | 28,954 (47.7)           |
| Asian/Pacific Islander                                             | 33,124 (10.1)                                        | 5,088 (8.4)             |
| Other, mixed race, or unknown race                                 | 30,663 (9.3)                                         | 7,723 (12.0)            |
| Community median income <sup>1</sup>                               |                                                      |                         |
| <\$50,000                                                          | 51,236 (15.8)                                        | 13,141 (22.6)           |
| \$50,000-\$99,999                                                  | 197,975 (61.1)                                       | 34,070 (58.5)           |
| \$100,000-149,999                                                  | 66,279 (20.4)                                        | 9,440 (16.2)            |
| ≥\$150,000                                                         | 8,738 (2.7)                                          | 1,587 (2.7)             |
| Cigarette smoking <sup>1</sup>                                     |                                                      |                         |
| Never smoker                                                       | 198,294 (81.4)                                       | 34,834 (78.5)           |
| Current smoker                                                     | 10,138 (4.2)                                         | 2,255 (5.1)             |
| Former smoker                                                      | 35,069 (14.4)                                        | 7,296 (16.4)            |
| Body mass index <sup>1</sup>                                       |                                                      |                         |
| Underweight (<18.5)                                                | 24,043 (9.7)                                         | 3,847 (7.9)             |
| Normal weight (18.5-24.9)                                          | 60,702 (24.4)                                        | 11,706 (24.2)           |
| Overweight (25.0-29.9)                                             | 69,807 (28.1)                                        | 13,873 (28.7)           |
| Obese (≥30)                                                        | 94,123 (37.8)                                        | 18,992 (39.2)           |
| Healthcare utilization: outpatient visits                          |                                                      |                         |
| 0-4                                                                | 114,208 (34.7)                                       | 19,299 (31.8)           |
| 5-9                                                                | 89,891 (27.3)                                        | 14,958 (24.6)           |
| 10-14                                                              | 48,057 (14.6)                                        | 8,926 (14.7)            |
| 15-19                                                              | 27,175 (8.3)                                         | 5,405 (8.9)             |
| ≥20                                                                | 49,864 (15.1)                                        | 12,113 (20.0)           |
| Healthcare utilization: ED visits                                  |                                                      |                         |
| 0                                                                  | 269,559 (81.9)                                       | 35,800 (59.0)           |
| 1                                                                  | 42,401 (12.9)                                        | 14,833 (24.4)           |
| 2                                                                  | 10,660 (3.2)                                         | 5,227 (8.6)             |
| ≥3                                                                 | 6,575 (2.0)                                          | 4,841 (8.0)             |
| Healthcare utilization: inpatient admissions                       |                                                      |                         |
| 0                                                                  | 319,297 (97.0)                                       | 58,302 (96.0)           |
| 1                                                                  | 5,333 (1.6)                                          | 1,248 (2.1)             |
| 2                                                                  | 2,215 (0.7)                                          | 516 (0.9)               |
| ≥3                                                                 | 2,350 (0.7)                                          | 635 (1.0)               |
| Charlson comorbidity index                                         |                                                      |                         |
| 0                                                                  | 265,307 (80.6)                                       | 45,474 (74.9)           |
| 1-2                                                                | 52,570 (16.0)                                        | 10,817 (17.8)           |
| 3-5                                                                | 8,446 (2.6)                                          | 2,919 (4.8)             |
| ≥6                                                                 | 2,872 (0.9)                                          | 1,491 (2.5)             |
| Prior SARS-CoV-2 infection <sup>2</sup>                            |                                                      |                         |
| Documented previous infection                                      | 1,606 (0.5)                                          | 336 (0.6)               |
| COVID-19 vaccination                                               |                                                      |                         |
| Unvaccinated                                                       | 106,322 (32.3)                                       | 21,188 (34.9)           |
| Ad.26.COVID.S—1 dose                                               | 9,850 (3.0)                                          | 2,052 (3.4)             |
| Ad.26.COVID.S—with any booster dose                                | 3,449 (1.0)                                          | 740 (1.2)               |
| BNT162b2 or mRNA-1273—1 dose                                       | 9,069 (2.8)                                          | 1,712 (2.8)             |
| BNT162b2 or mRNA-1273—2 doses (≥180 days prior)                    | 110,296 (33.5)                                       | 19,017 (31.3)           |
| BNT162b2 or mRNA-1273—2 doses (91-180 days prior)                  | 26,057 (7.9)                                         | 4,534 (7.5)             |
| BNT162b2 or mRNA-1273—2 doses (≤90 days prior)                     | 12,329 (3.7)                                         | 2,142 (3.5)             |
| BNT162b2 or mRNA-1273—3 doses                                      | 51,823 (15.7)                                        | 9,316 (15.3)            |
| Symptoms                                                           |                                                      |                         |
| Any new-onset acute respiratory symptoms on or before testing date | 254,242 (77.2)                                       | 48,039 (79.1)           |
| Days since symptoms onset, among symptomatic cases, mean (±SD)     | 3.9 (±3.5)                                           | 4.1 (±3.9)              |

| Subsequent outcomes |                                |             |             |
|---------------------|--------------------------------|-------------|-------------|
|                     | Any hospital admission         | 2,428 (0.7) | 1,058 (1.7) |
|                     | Symptomatic hospital admission | 2,181 (0.7) | 1,006 (1.7) |

<sup>1</sup>Multiple imputation was used to address missing data; numbers may not add to column totals where missing values occur. The number of missing observations for each variable is specified in **Table S21**.

<sup>2</sup>Previous infection defined by any positive test result or diagnosis  $\geq 90$  days prior to the date of the current test.



**Table S19: Onset of acute respiratory symptoms on or before dates of testing and hospital admission.**

| Case sample                                                         | Number of cases with symptom onset by indicated time (%) |                       |
|---------------------------------------------------------------------|----------------------------------------------------------|-----------------------|
|                                                                     | No SGTF                                                  | SGTF                  |
| All cases—onset on or before testing date                           | <i>15 December, 2021 to 17 January, 2022</i>             |                       |
|                                                                     | <i>N=23,517</i>                                          | <i>N=224,065</i>      |
|                                                                     | <i>19,179 (81.6)</i>                                     | <i>174,528 (77.9)</i> |
|                                                                     | <i>3 February to 17 March, 2022</i>                      |                       |
|                                                                     | <i>N=1,937</i>                                           | <i>N=12,892</i>       |
|                                                                     | <i>1,573 (81.2)</i>                                      | <i>9,102 (70.6)</i>   |
| Cases tested in outpatient settings—onset on or before testing date | <i>15 December, 2021 to 17 January, 2022</i>             |                       |
|                                                                     | <i>N=23,305</i>                                          | <i>N=222,688</i>      |
|                                                                     | <i>19,005 (81.5)</i>                                     | <i>173,575 (77.9)</i> |
|                                                                     | <i>3 February to 17 March, 2022</i>                      |                       |
|                                                                     | <i>N=1,905</i>                                           | <i>N=12,756</i>       |
|                                                                     | <i>1,546 (81.2)</i>                                      | <i>9,014 (70.7)</i>   |
| Hospitalized cases—onset on or before hospital admission date       | <i>15 December, 2021 to 17 January, 2022</i>             |                       |
|                                                                     | <i>N=343</i>                                             | <i>N=1,441</i>        |
|                                                                     | <i>301 (87.8)</i>                                        | <i>1,061 (73.6)</i>   |
|                                                                     | <i>3 February to 17 March, 2022</i>                      |                       |
|                                                                     | <i>N=49</i>                                              | <i>N=224</i>          |
|                                                                     | <i>41 (83.7)</i>                                         | <i>179 (79.9)</i>     |

SGTF: S gene target failure, here interpreted as a proxy for SARS-CoV-2 variant.

Symptoms data were collected from free-text fields of patient EHRs, including data from clinical notes and from responses to questionnaires addressing symptoms in the 14 days before testing which all patients must complete to receive a test.

**Table S20: Attributes of outpatient cases with and without symptoms at the time of outpatient testing, 1 November, 2021 to 17 March, 2022.**

| Characteristic                                    | Number of cases (%)                      |                             |
|---------------------------------------------------|------------------------------------------|-----------------------------|
|                                                   | Symptoms onset on or before testing date | No symptoms by date of test |
|                                                   | N=308,720                                | N=88,606                    |
| Age <sup>1</sup>                                  |                                          |                             |
| <1 year                                           | 2,950 (1.0)                              | 585 (0.7)                   |
| 1-4 years                                         | 9,929 (3.2)                              | 3,967 (4.5)                 |
| 5-9 years                                         | 13,997 (4.5)                             | 8,418 (9.5)                 |
| 10-19 years                                       | 33,085 (10.7)                            | 15,791 (17.8)               |
| 20-29 years                                       | 50,055 (16.2)                            | 9,755 (11.0)                |
| 30-39 years                                       | 63,011 (20.4)                            | 13,156 (14.8)               |
| 40-49 years                                       | 51,922 (16.8)                            | 12,239 (13.8)               |
| 50-59 years                                       | 41,244 (13.4)                            | 10,999 (12.4)               |
| 60-69 years                                       | 24,186 (7.8)                             | 7,633 (8.6)                 |
| 70-79 years                                       | 10,309 (3.3)                             | 3,845 (4.3)                 |
| ≥80 years                                         | 4,217 (1.4)                              | 1,221 (1.4)                 |
| Sex                                               |                                          |                             |
| Female                                            | 174,230 (56.4)                           | 46,065 (52.0)               |
| Male                                              | 134,490 (43.6)                           | 42,541 (48.0)               |
| Race/ethnicity                                    |                                          |                             |
| White, non-Hispanic                               | 72,267 (23.4)                            | 19,179 (21.6)               |
| Black, non-Hispanic                               | 22,973 (7.4)                             | 8,913 (10.1)                |
| Hispanic                                          | 153,717 (49.8)                           | 42,813 (48.3)               |
| Asian/Pacific Islander                            | 29,639 (9.6)                             | 9,069 (10.2)                |
| Other, mixed race, or unknown race                | 30,124 (9.8)                             | 8,632 (9.7)                 |
| Community median income <sup>1</sup>              |                                          |                             |
| <\$50,000                                         | 50,148 (16.6)                            | 15,685 (18.0)               |
| \$50,000-\$99,999                                 | 184,365 (61.0)                           | 51,811 (59.5)               |
| \$100,000-149,999                                 | 59,993 (19.8)                            | 16,891 (19.4)               |
| ≥\$150,000                                        | 7,831 (2.6)                              | 2,665 (3.1)                 |
| Cigarette smoking <sup>1</sup>                    |                                          |                             |
| Never smoker                                      | 184,224 (80.4)                           | 52,824 (82.3)               |
| Current smoker                                    | 10,021 (4.4)                             | 2,682 (4.2)                 |
| Former smoker                                     | 35,026 (15.3)                            | 8,669 (13.5)                |
| Body mass index <sup>1</sup>                      |                                          |                             |
| Underweight (<18.5)                               | 18,837 (7.9)                             | 9,308 (14.2)                |
| Normal weight (18.5-24.9)                         | 56,445 (23.7)                            | 17,518 (26.6)               |
| Overweight (25.0-29.9)                            | 67,792 (28.5)                            | 17,912 (27.2)               |
| Obese (≥30)                                       | 95,181 (39.9)                            | 21,037 (32.0)               |
| Healthcare utilization: outpatient visits         |                                          |                             |
| 0-4                                               | 101,333 (32.8)                           | 33,993 (38.4)               |
| 5-9                                               | 82,114 (26.6)                            | 23,961 (27.0)               |
| 10-14                                             | 45,891 (14.9)                            | 12,086 (13.6)               |
| 15-19                                             | 26,869 (8.7)                             | 6,556 (7.4)                 |
| ≥20                                               | 52,513 (17.0)                            | 12,010 (13.6)               |
| Healthcare utilization: ED visits                 |                                          |                             |
| 0                                                 | 235,765 (76.4)                           | 73,796 (83.3)               |
| 1                                                 | 48,124 (15.6)                            | 10,708 (12.1)               |
| 2                                                 | 14,097 (4.6)                             | 2,514 (2.8)                 |
| ≥3                                                | 10,734 (3.5)                             | 1,588 (1.8)                 |
| Healthcare utilization: inpatient admissions      |                                          |                             |
| 0                                                 | 296,595 (96.1)                           | 85,922 (97.0)               |
| 1                                                 | 6,340 (2.1)                              | 1,365 (1.5)                 |
| 2                                                 | 2,663 (0.9)                              | 584 (0.7)                   |
| ≥3                                                | 3,122 (1.0)                              | 735 (0.8)                   |
| Charlson comorbidity index                        |                                          |                             |
| 0                                                 | 243,602 (78.9)                           | 71,408 (80.6)               |
| 1-2                                               | 51,309 (16.6)                            | 13,575 (15.3)               |
| 3-5                                               | 9,720 (3.1)                              | 2,644 (3.0)                 |
| ≥6                                                | 4,089 (1.3)                              | 979 (1.1)                   |
| Prior SARS-CoV-2 infection <sup>2</sup>           |                                          |                             |
| No documented previous infection                  | 307,191 (99.5)                           | 88,159 (99.5)               |
| Documented previous infection                     | 1,529 (0.5)                              | 447 (0.5)                   |
| COVID-19 vaccination                              |                                          |                             |
| Unvaccinated                                      | 97,234 (31.5)                            | 33,533 (37.8)               |
| Ad.26.COVID.S—1 dose                              | 10,023 (3.2)                             | 2,154 (2.4)                 |
| Ad.26.COVID.S—with any booster dose               | 3,399 (1.1)                              | 862 (1.0)                   |
| BNT162b2 or mRNA-1273—1 dose                      | 8,318 (2.7)                              | 2,665 (3.0)                 |
| BNT162b2 or mRNA-1273—2 doses (≥180 days prior)   | 107,654 (34.9)                           | 23,622 (26.7)               |
| BNT162b2 or mRNA-1273—2 doses (91-180 days prior) | 24,124 (7.8)                             | 6,830 (7.7)                 |
| BNT162b2 or mRNA-1273—2 doses (≤90 days prior)    | 10,455 (3.4)                             | 4,166 (4.7)                 |
| BNT162b2 or mRNA-1273—3 doses                     | 47,513 (15.4)                            | 14,774 (16.7)               |

<sup>1</sup>Multiple imputation was used to address missing data; numbers may not add to column totals where missing values occur. The number of missing observations for each variable is specified in **Table S21**.

<sup>2</sup>Previous infection defined by any positive test result or diagnosis ≥90 days prior to the date of the current test.

**Table S21: Summary of missing data.**

| Variable                                                   | Missing observations, <i>n</i> (%) among cases tested in outpatient settings |                             |
|------------------------------------------------------------|------------------------------------------------------------------------------|-----------------------------|
|                                                            | Full analysis population <sup>1</sup>                                        | Population enrolled ≥1 year |
|                                                            | <i>N</i> =329,195                                                            | <i>N</i> =283,453           |
| Age                                                        | 2,535 (0.8)                                                                  | 755 (0.3)                   |
| Sex                                                        | 1,057 (0.3)                                                                  | 755 (0.3)                   |
| Community median income                                    | 6,024 (1.8)                                                                  | 1,014 (0.4)                 |
| History of cigarette smoking                               | 86,751 (26.3)                                                                | 64,961 (22.9)               |
| BMI                                                        | 81,577 (24.7)                                                                | 62,826 (22.1)               |
| Any missing observation                                    | 107,870 (32.7)                                                               | 81,923 (28.8)               |
| Total missing observations, across all covariates analyzed | 188,514 (3.8)                                                                | 137,861 (3.2)               |

<sup>1</sup>The primary analysis population includes outpatient-tested cases whose samples were processed using the ThermoFisher TaqPath COVID-19 combo kit.

**Table S22: Association of imputed variables with symptomatic hospital admission endpoint across differing analysis strategies.**

| Characteristic                                       | Case population <sup>1</sup> | Primary analysis:<br>Adjusted hazard ratio<br>(95% CI) | Complete case analysis:<br>Adjusted hazard ratio<br>(95% CI) | Participants enrolled<br>≥1 year: Adjusted<br>hazard ratio (95% CI) |
|------------------------------------------------------|------------------------------|--------------------------------------------------------|--------------------------------------------------------------|---------------------------------------------------------------------|
| Age                                                  | <1 year                      | 0.12 (0.04, 0.36)                                      | --                                                           | --                                                                  |
|                                                      | 1-4 year                     | 0.32 (0.16, 0.61)                                      | 0.34 (0.12, 0.94)                                            | 0.28 (0.13, 0.60)                                                   |
|                                                      | 5-9 years                    | 0.27 (0.14, 0.50)                                      | 0.44 (0.23, 0.87)                                            | 0.24 (0.12, 0.48)                                                   |
|                                                      | 10-19 years                  | 0.28 (0.19, 0.41)                                      | 0.31 (0.21, 0.48)                                            | 0.29 (0.20, 0.43)                                                   |
|                                                      | 20-29 years                  | 0.86 (0.71, 1.04)                                      | 0.90 (0.73, 1.10)                                            | 0.84 (0.68, 1.04)                                                   |
|                                                      | 30-39 years                  | ref.                                                   | ref.                                                         | ref.                                                                |
|                                                      | 40-49 years                  | 0.76 (0.64, 0.92)                                      | 0.70 (0.57, 0.86)                                            | 0.78 (0.64, 0.96)                                                   |
|                                                      | 50-59 years                  | 0.85 (0.70, 1.03)                                      | 0.79 (0.64, 0.98)                                            | 0.90 (0.73, 1.11)                                                   |
|                                                      | 60-69 years                  | 1.34 (1.09, 1.65)                                      | 1.19 (0.95, 1.49)                                            | 1.44 (1.15, 1.79)                                                   |
|                                                      | 70-79 years                  | 1.99 (1.55, 2.56)                                      | 1.79 (1.37, 2.32)                                            | 2.01 (1.55, 2.62)                                                   |
| ≥80 years                                            | 2.89 (2.08, 3.99)            | 2.38 (1.68, 3.39)                                      | 2.88 (2.04, 4.07)                                            |                                                                     |
| Community median income<br>(continuous) <sup>2</sup> | Per 1-log increase           | 0.99 (0.85, 1.14)                                      | 1.04 (0.88, 1.23)                                            | 1.01 (0.86, 1.18)                                                   |
| Community median income<br>(factorized) <sup>2</sup> | <\$50,000                    | 0.95 (0.80, 1.13)                                      | 0.94 (0.79, 1.12)                                            | 0.95 (0.80, 1.13)                                                   |
|                                                      | \$50,000-\$99,999            | ref.                                                   | ref.                                                         | ref.                                                                |
|                                                      | \$100,000-\$149,999          | 0.88 (0.75, 1.04)                                      | 0.91 (0.77, 1.08)                                            | 0.88 (0.74, 1.04)                                                   |
|                                                      | ≥\$150,000                   | 0.64 (0.39, 1.04)                                      | 0.72 (0.45, 1.15)                                            | 0.65 (0.40, 1.05)                                                   |
| Cigarette smoking <sup>2</sup>                       | Never smoker                 | ref.                                                   | ref.                                                         | ref.                                                                |
|                                                      | Current smoker               | 0.97 (0.75, 1.24)                                      | 1.09 (0.82, 1.45)                                            | 0.97 (0.73, 1.30)                                                   |
|                                                      | Former smoker                | 1.01 (0.87, 1.17)                                      | 1.06 (0.91, 1.24)                                            | 1.04 (0.89, 1.22)                                                   |
| Body mass index <sup>2</sup>                         | Underweight (<18.5)          | 0.80 (0.51, 1.27)                                      | 0.72 (0.39, 1.33)                                            | 0.91 (0.56, 1.49)                                                   |
|                                                      | Normal weight (18.5-24.9)    | ref.                                                   | ref.                                                         | ref.                                                                |
|                                                      | Overweight (25.0-29.9)       | 1.35 (1.13, 1.62)                                      | 1.47 (1.21, 1.79)                                            | 1.33 (1.10, 1.61)                                                   |
|                                                      | Obese (≥30)                  | 1.60 (1.36, 1.90)                                      | 1.71 (1.42, 2.07)                                            | 1.61 (1.34, 1.94)                                                   |

CI: confidence interval. Adjusted Cox proportional hazards models control for all variables listed in **Table S2**, with strata for testing date

<sup>1</sup>The primary analysis population includes outpatient-tested cases whose samples were processed using the ThermoFisher TaqPath COVID-19 combo kit.

<sup>2</sup>Primary analyses addressed community median household income as a continuous variable; we present the factorized version (broken down by increments of \$50,000/year) to further illustrate similarity of effect estimates across the analysis strategies.

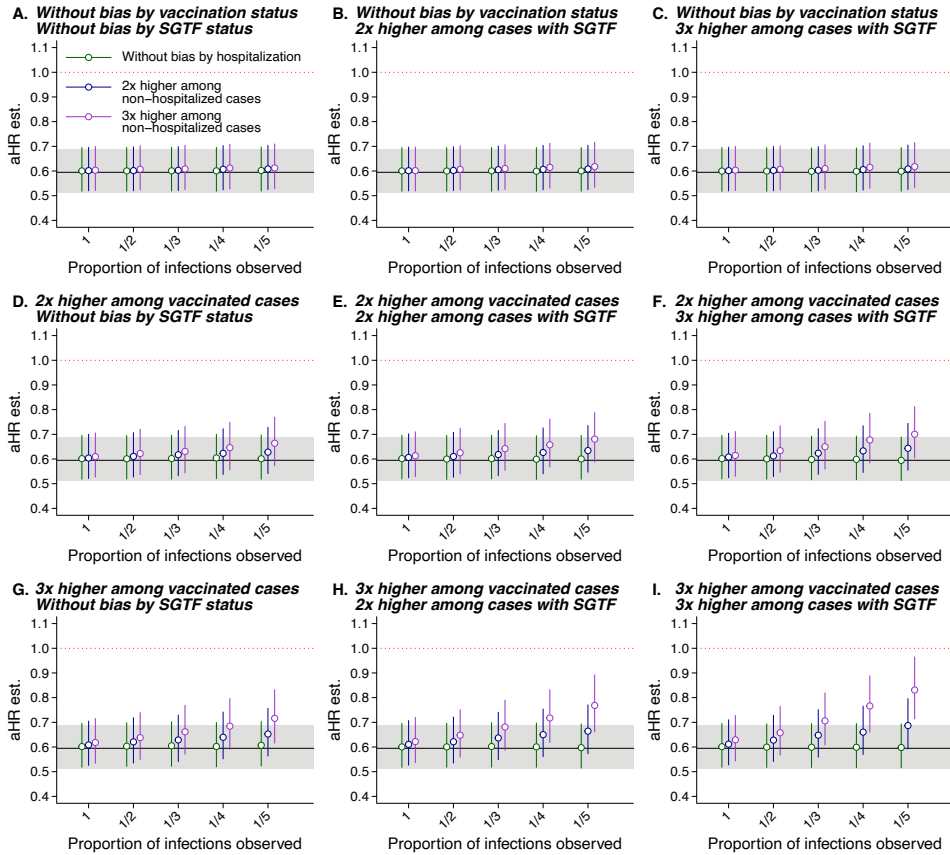

**Figure S1: Estimates of the adjusted hazard ratio (aHR) of any hospital admission under scenarios of differential unobserved prior infection prevalence across case strata.** We illustrate values of the aHR of any hospital admission among outpatient diagnosed cases with Omicron vs. Delta infection, estimated in analyses allowing for differing levels of prior infection prevalence according to their infecting variant, outcome (hospital admission or no hospital admission), and history of vaccination. Panels indicate the fold elevation in infection prevalence applied to each stratum over a baseline proportion of infections assumed to be unascertained on the x-axis for unvaccinated cases with Delta variant infection who were hospitalized (highest-risk stratum). Horizontal lines at aHR=0.59 and accompanying gray shaded areas delineate the point estimate and 95% confidence interval from primary analysis models.

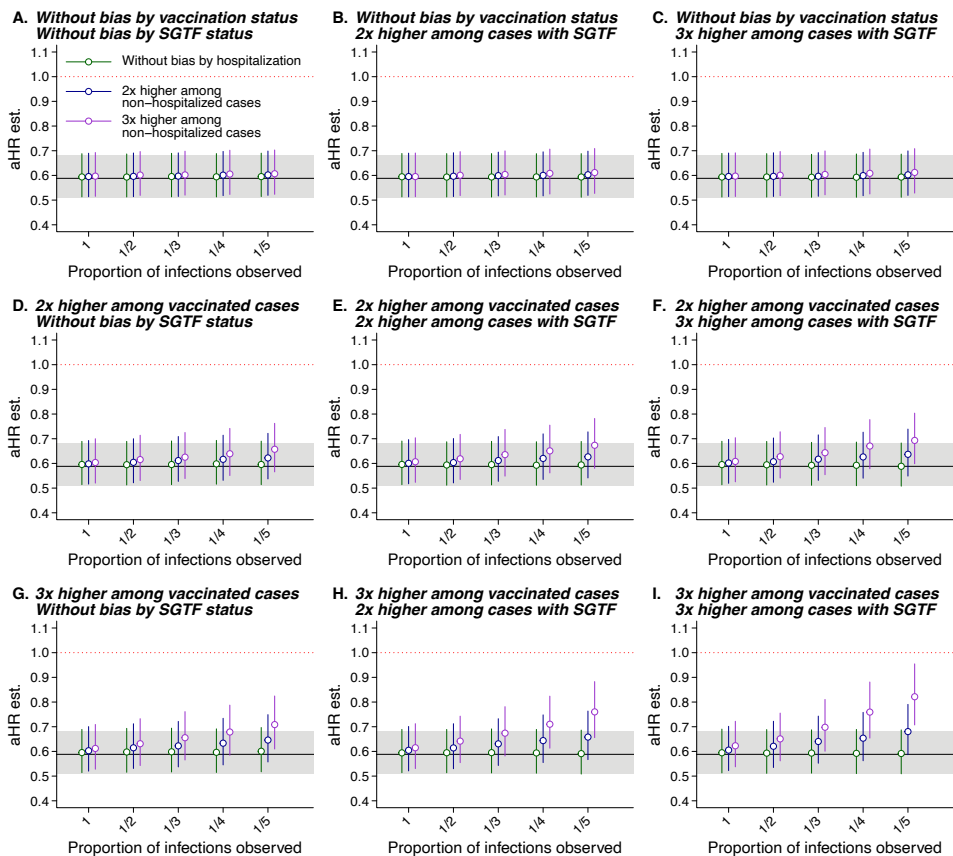

**Figure S2: Estimates of the adjusted hazard ratio (aHR) of symptomatic hospital admission under scenarios of differential unobserved prior infection prevalence across case strata.** We illustrate values of the aHR of any hospital admission among outpatient diagnosed cases with Omicron vs. Delta infection, estimated in analyses allowing for differing levels of prior infection prevalence according to their infecting variant, outcome (symptomatic hospital admission or no symptomatic hospital admission), and history of vaccination. Panels indicate the fold elevation in infection prevalence applied to each stratum over a baseline proportion of infections assumed to be unascertained on the x-axis for unvaccinated cases with Delta variant infection who were hospitalized (highest-risk stratum). Horizontal lines at  $aHR=0.59$  and accompanying gray shaded areas delineate the point estimate and 95% confidence interval from primary analysis models.

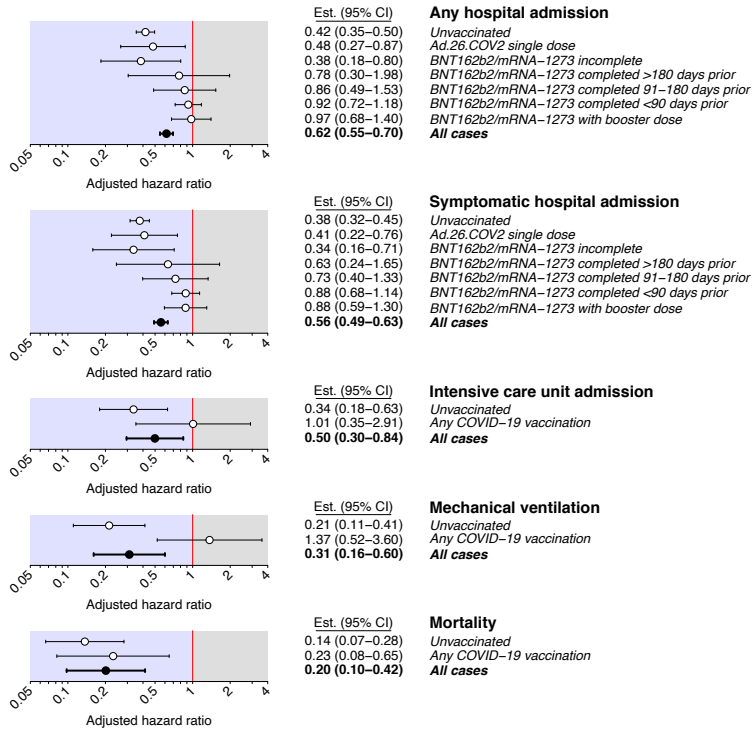

**Figure S3: Adjusted hazard ratios of severe clinical endpoints associated with Omicron variant infection, without restriction by diagnosis setting.** Points and lines denote estimates and accompanying 95% confidence intervals for the adjusted hazard ratio of each endpoint, comparing cases with Omicron versus Delta variant infection, in case strata defined by history of COVID-19 vaccination. Analyses are restricted to individuals tested diagnosed by RT-PCR testing using the ThermoFisher TaqPath COVID-19 combo kit, in contrast to **Figure 3** which further limits analyses to cases diagnosed in outpatient settings. Adjusted hazard ratios are estimated using Cox proportional hazards regression models, controlling for covariates listed in **Table S2** and defining strata for testing date.

**Proportion of cases identified at admission**

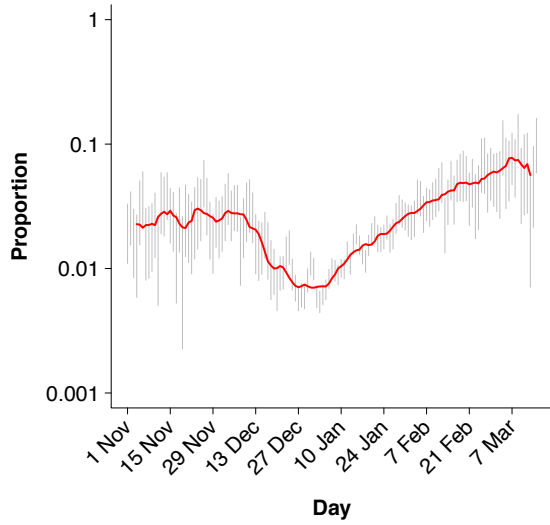

**Figure S4: Changes in the proportion of cases ascertained on or after the date of hospital admission.** We illustrate day-specific estimates of the proportion of cases ascertained on or after the hospital admission date with 95% confidence intervals generated by bootstrap sampling (grey lines) as well as the 7-day moving average (red line).
